# Supplementary material for: Polyphenols from Acorn Leaves (Quercus liaotungensis) Protect Pancreatic Beta Cells and Their Inhibitory Activity against α-Glucosidase and Protein Tyrosine Phosphatase 1B
Source: PubMed Central journal article supplement (PMC6225166; doi:10.3390/molecules23092167), 2018-08-28
Supplement: molecules-23-02167-s001.pdf [file molecules-23-02167-s001.pdf]

## **Supplementary Materials**

### **Polyphenols from acorn leaves (*Quercus liaotungensis*) protect pancreatic beta cells and their inhibitory activity against $\alpha$ -glucosidase and protein tyrosine phosphatase 1B**

Jing Xu<sup>a,b</sup>, Xude Wang<sup>a,b</sup>, Jiayin Yue<sup>a,b</sup>, Yuanyuan Sun<sup>a,b</sup>, Xiaoshu Zhang<sup>a,b\*</sup>, Yuqing Zhao<sup>a, b\*</sup>

<sup>a</sup> *School of Functional Food and Wine, Shenyang Pharmaceutical University, Shenyang 110016, People's Republic of China.*

<sup>b</sup> *Key Laboratory of Structure-based Drug Design and Discovery of Ministry of Education, Shenyang Pharmaceutical University, Shenyang 110016, China.*

\* Corresponding author.

Tel: +86-24-23986521, Fax: +86-24-23986521, email: zyq4885@126.com \*(Y. Zhao) or Tel:

+86-24-23986522, Fax: +86-24-23986521, email: xiaoshu2397@163.com \*(X. Zhang)

## CONTENT

- Figure S1.** HR-ESI-MS of compound 1
- Figure S2.**  $^1\text{H}$ -NMR of Compound 1
- Figure S3.**  $^{13}\text{C}$ -NMR of Compound 1
- Figure S4.** HSQC of Compound 1
- Figure S5.** HMBC of Compound 1
- Figure S6.**  $^1\text{H}$ -NMR of of compound 2
- Figure S7.**  $^{13}\text{C}$ -NMR of Compound 2
- Figure S8.** HSQC of Compound 2
- Figure S9.** HMBC of Compound 2
- Figure S10.**  $^1\text{H}$ -NMR of Compound 3
- Figure S11.**  $^{13}\text{C}$ -NMR of Compound 3
- Figure S12.**  $^1\text{H}$ -NMR of Compound 4
- Figure S13.**  $^{13}\text{C}$ -NMR of Compound 4
- Figure S14.**  $^1\text{H}$ -NMR of Compound 5
- Figure S15.**  $^{13}\text{C}$ -NMR of Compound 5
- Figure S16.**  $^1\text{H}$ -NMR of Compound 6
- Figure S17.**  $^{13}\text{C}$ -NMR of Compound 6
- Figure S18.**  $^1\text{H}$ -NMR of Compound 7
- Figure S19.**  $^{13}\text{C}$ -NMR of Compound 7
- Figure S20.**  $^1\text{H}$ -NMR of Compound 8
- Figure S21.**  $^{13}\text{C}$ -NMR of Compound 8
- Figure S22.**  $^1\text{H}$ -NMR of Compound 9
- Figure S23.**  $^{13}\text{C}$ -NMR of Compound 9
- Figure S24.**  $^1\text{H}$ -NMR of Compound 10
- Figure S25.**  $^{13}\text{C}$ -NMR of Compound 10
- Figure S26.**  $^1\text{H}$ -NMR of Compound 11
- Figure S27.**  $^{13}\text{C}$ -NMR of Compound 11
- Figure S28.**  $^1\text{H}$ -NMR of Compound 12
- Figure S29.**  $^{13}\text{C}$ -NMR of Compound 12
- Figure S30.**  $^1\text{H}$ -NMR of Compound 13

**Figure S31.**  $^{13}\text{C}$ -NMR of Compound 13  
**Figure S32.**  $^1\text{H}$ -NMR of Compound 14  
**Figure S33.**  $^{13}\text{C}$ -NMR of Compound 14  
**Figure S34.**  $^1\text{H}$ -NMR of Compound 15  
**Figure S35.**  $^{13}\text{C}$ -NMR of Compound 15  
**Figure S36.**  $^1\text{H}$ -NMR of Compound 16  
**Figure S37.**  $^{13}\text{C}$ -NMR of Compound 16  
**Figure S38.**  $^1\text{H}$ -NMR of Compound 17  
**Figure S39.**  $^{13}\text{C}$ -NMR of Compound 17  
**Figure S40.**  $^1\text{H}$ -NMR of Compound 18  
**Figure S41.**  $^{13}\text{C}$ -NMR of Compound 18  
**Figure S42.**  $^1\text{H}$ -NMR of Compound 19  
**Figure S43.**  $^{13}\text{C}$ -NMR of Compound 19  
**Figure S44.**  $^1\text{H}$ -NMR of Compound 20  
**Figure S45.**  $^{13}\text{C}$ -NMR of Compound 20  
**Figure S46.**  $^1\text{H}$ -NMR of Compound 21  
**Figure S47.**  $^{13}\text{C}$ -NMR of Compound 21  
**Figure S48.**  $^1\text{H}$ -NMR of Compound 22  
**Figure S49.**  $^{13}\text{C}$ -NMR of Compound 22  
**Figure S50.**  $^1\text{H}$ -NMR of Compound 23  
**Figure S51.**  $^{13}\text{C}$ -NMR of Compound 23  
**Figure S52.**  $^{13}\text{C}$ -NMR of Compound 24  
**Figure S53.**  $^1\text{H}$ -NMR of Compound 25  
**Figure S54.**  $^{13}\text{C}$ -NMR of Compound 25  
**Figure S55.**  $^1\text{H}$ -NMR of Compound 26  
**Figure S56.**  $^{13}\text{C}$ -NMR of Compound 26

## Mass Spectrum SmartFormula Report

### Analysis Info

Analysis Name D:\Data\20180410CEYANG\XY-N-6\_1-C\_8\_01\_11803.d  
 Method 20131026\_ceyang b-ch3oh.m  
 Sample Name XY-N-6  
 Comment

Acquisition Date 4/10/2018 12:41:24 PM

Operator Bruker Customer  
 Instrument / Ser# micrOTOF-Q 125

### Acquisition Parameter

|             |          |                       |           |                  |           |
|-------------|----------|-----------------------|-----------|------------------|-----------|
| Source Type | ESI      | Ion Polarity          | Positive  | Set Nebulizer    | 1.2 Bar   |
| Focus       | Active   | Set Capillary         | 4500 V    | Set Dry Heater   | 180 °C    |
| Scan Begin  | 50 m/z   | Set End Plate Offset  | -500 V    | Set Dry Gas      | 8.0 l/min |
| Scan End    | 1500 m/z | Set Collision Cell RF | 400.0 Vpp | Set Divert Valve | Source    |

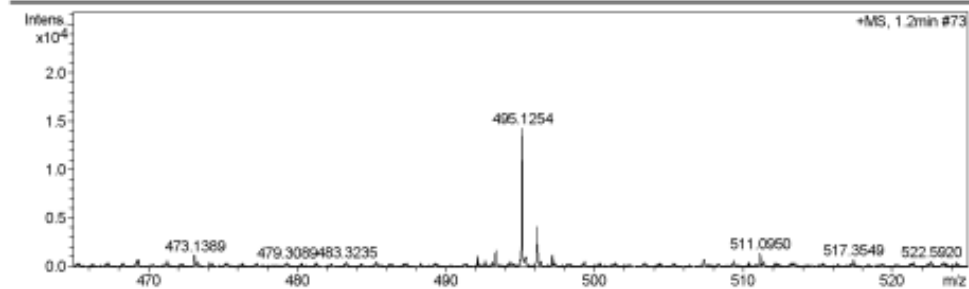

| Meas. m/z | #  | Formula                                             | m/z    | err [ppm] | Mean err [ppm] | rdb  | N-Rule | e <sup>-</sup> Conf | mSigma | Std I  | Std Mean m/z | Std Var/No | Std I m/z | Std Comb Dev |
|-----------|----|-----------------------------------------------------|--------|-----------|----------------|------|--------|---------------------|--------|--------|--------------|------------|-----------|--------------|
| 495.12    | 54 | 1 C <sub>24</sub> H <sub>24</sub> NaO <sub>10</sub> | 495.12 | 1.6       | 1.5            | 12.5 | ok     | even                | 21.35  | 0.0443 | 0.0023       | 0.0161     | 0.0006    | 0.8427       |

Figure S1. HR-ESI-MS of Compound 1

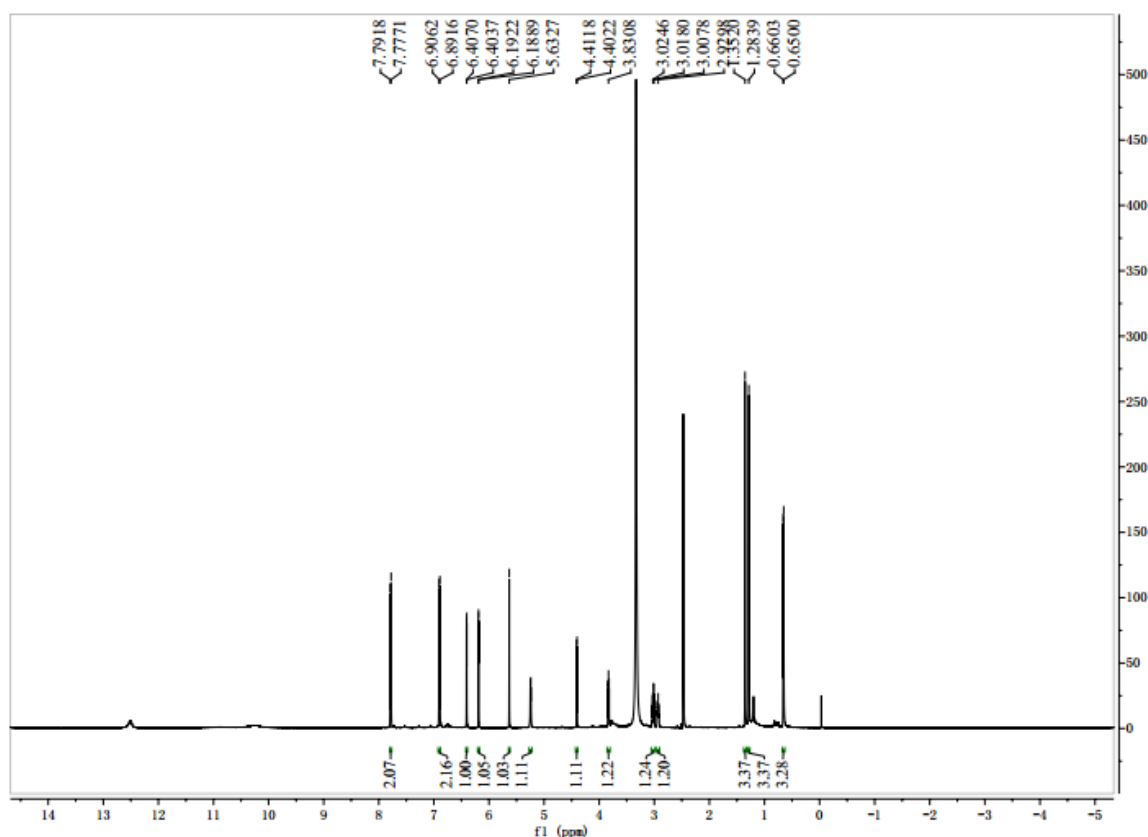

Figure S2. <sup>1</sup>H-NMR of Compound 1 (600MHz, DMSO-d<sub>6</sub>)

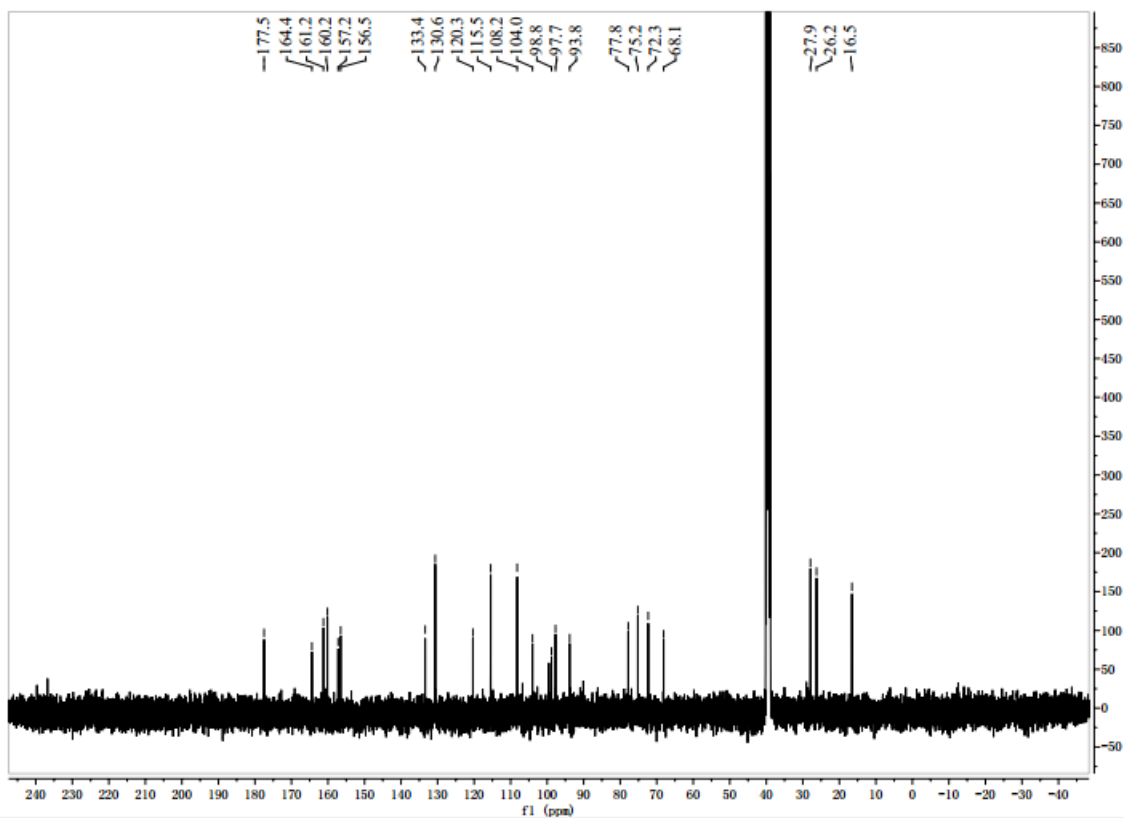

Figure S3.  $^{13}\text{C}$ -NMR of Compound 1 (100MHz,  $\text{DMSO-d}_6$ )

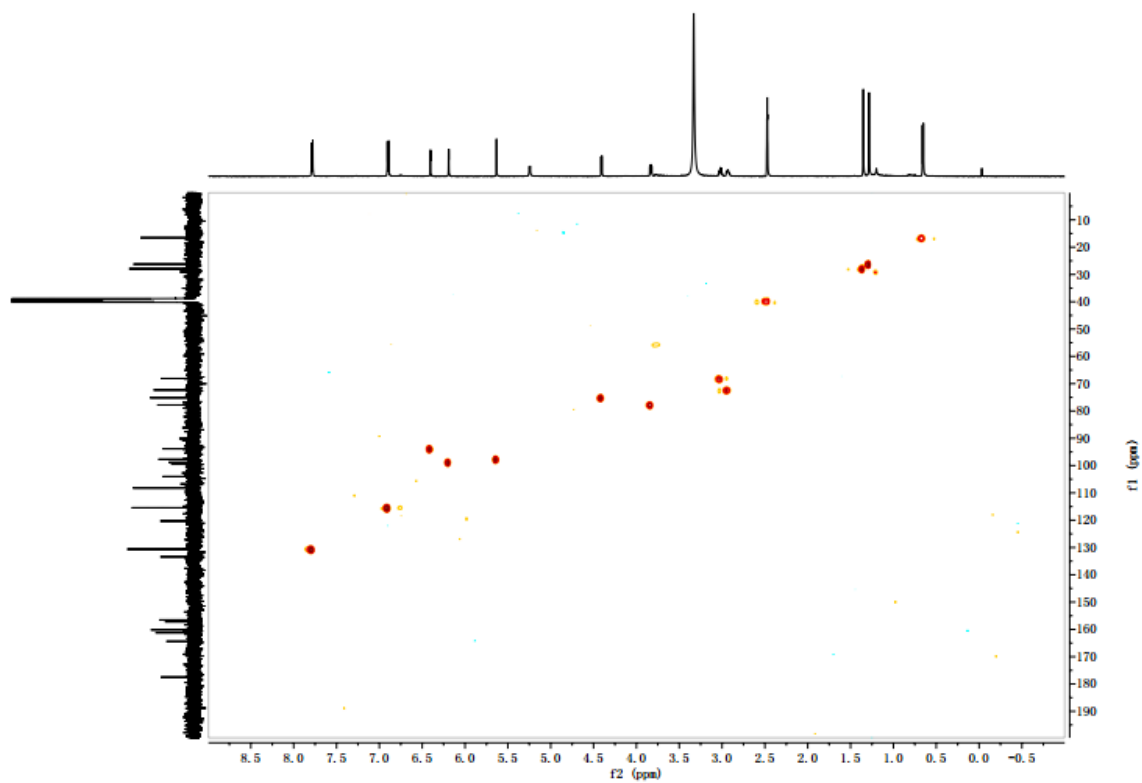

Figure S4. HSQC of Compound 1

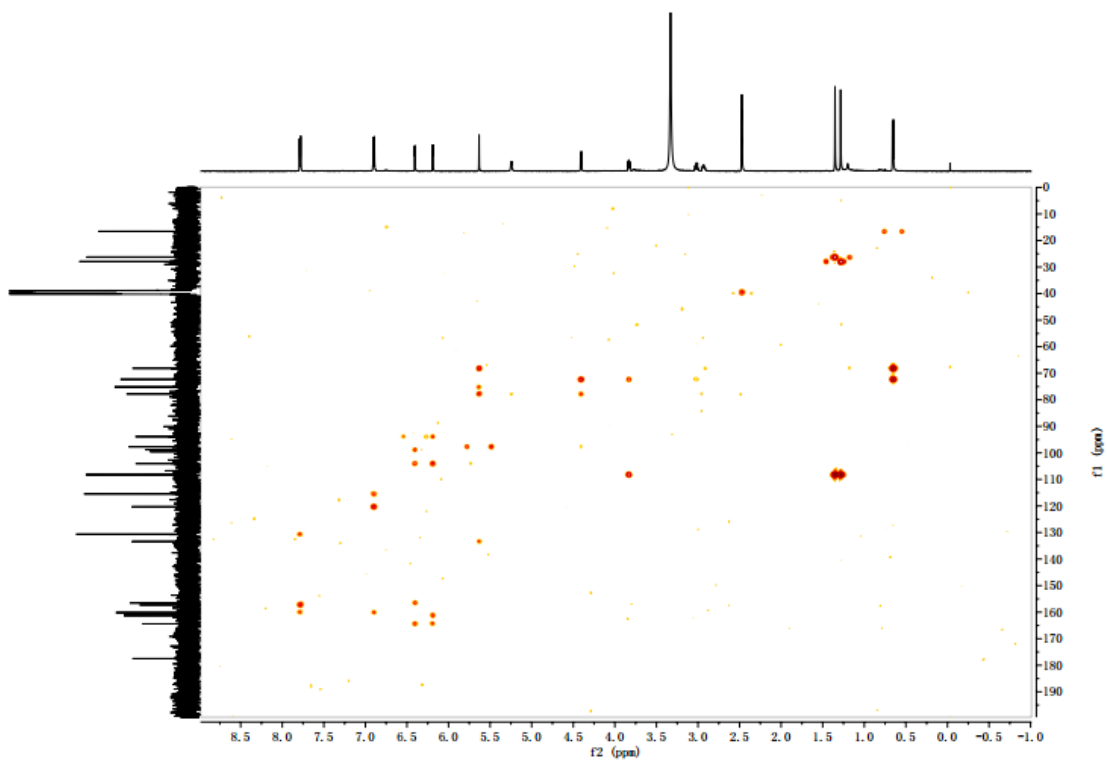

Figure S5. HMBC of Compound 1

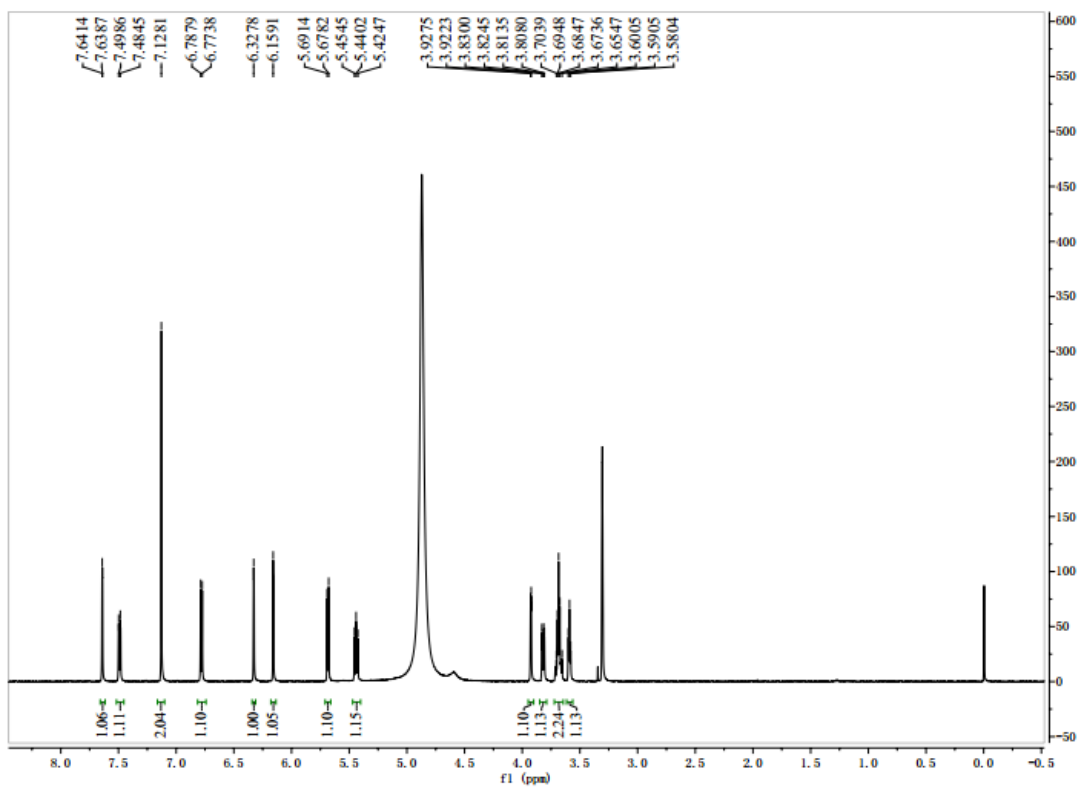

Figure S6. <sup>1</sup>H-NMR of Compound 2 (600MHz, CD<sub>3</sub>OD)

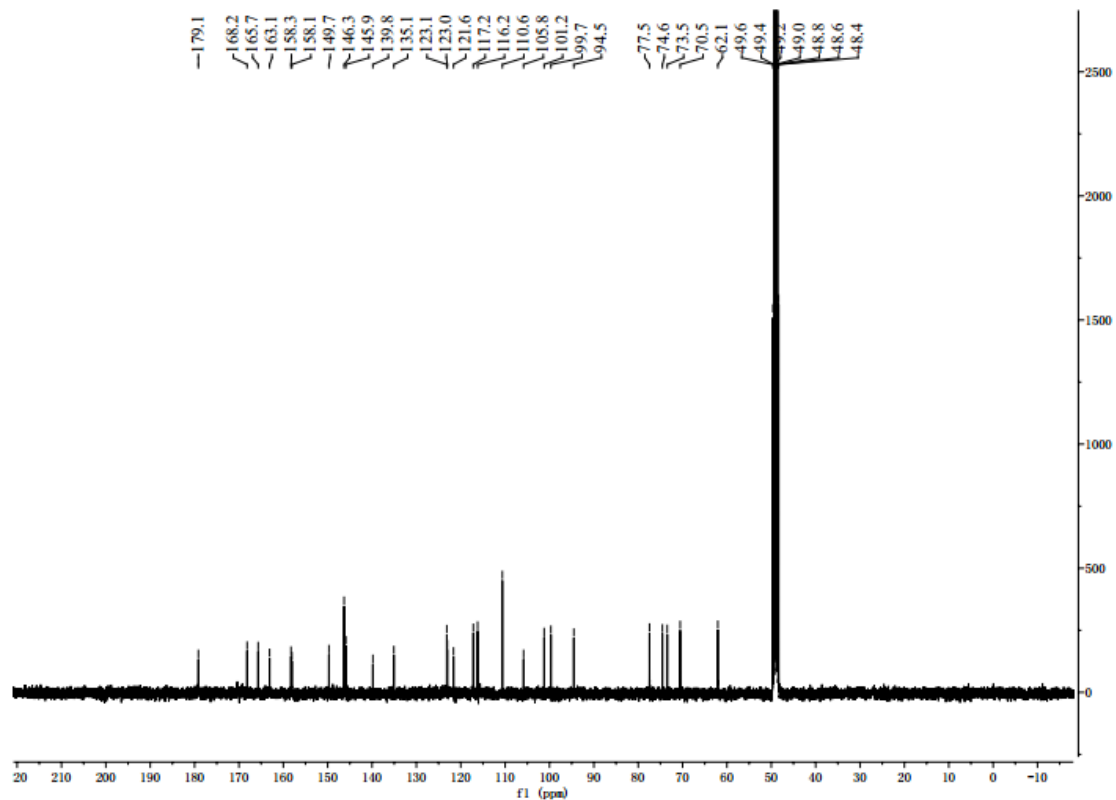

Figure S7.  $^{13}\text{C}$ -NMR of Compound 2 (100MHz,  $\text{CD}_3\text{OD}$ )

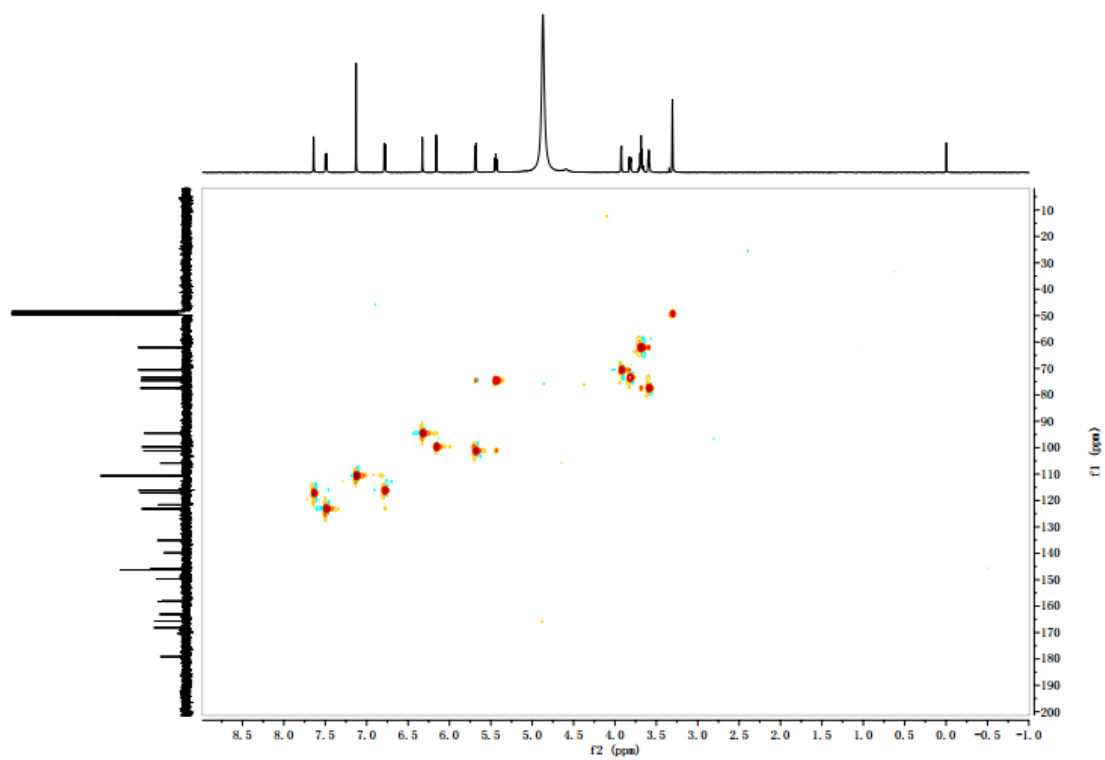

Figure S8. HSQC of Compound 2

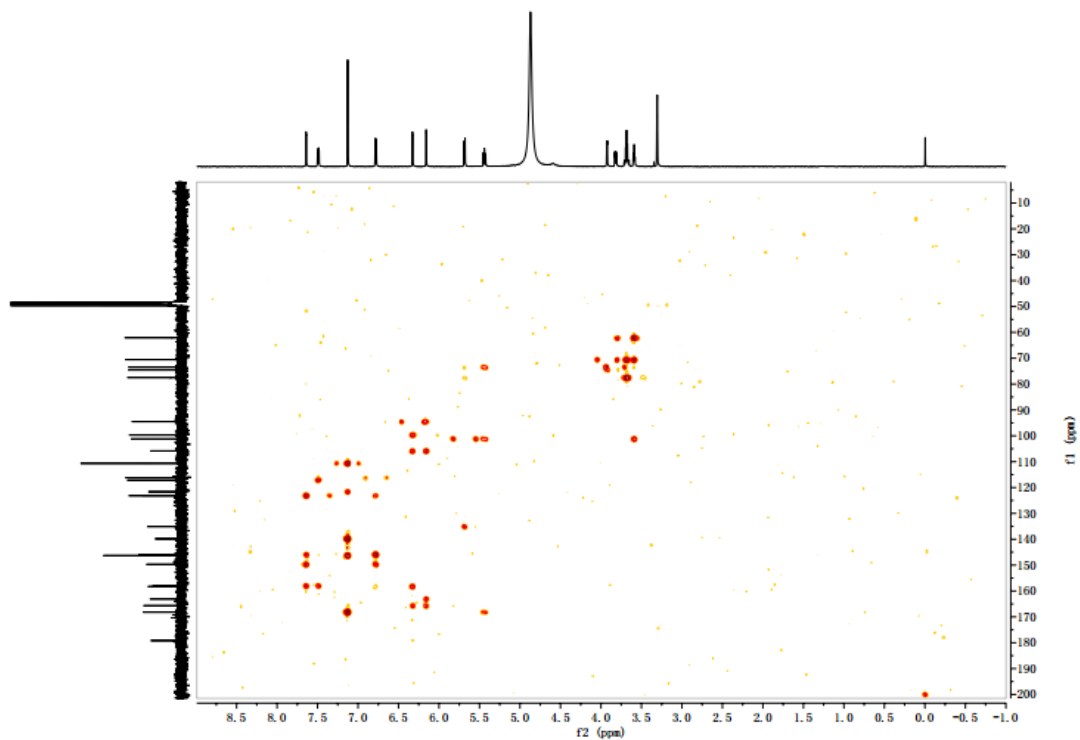

Figure S9. HMBC of Compound 2

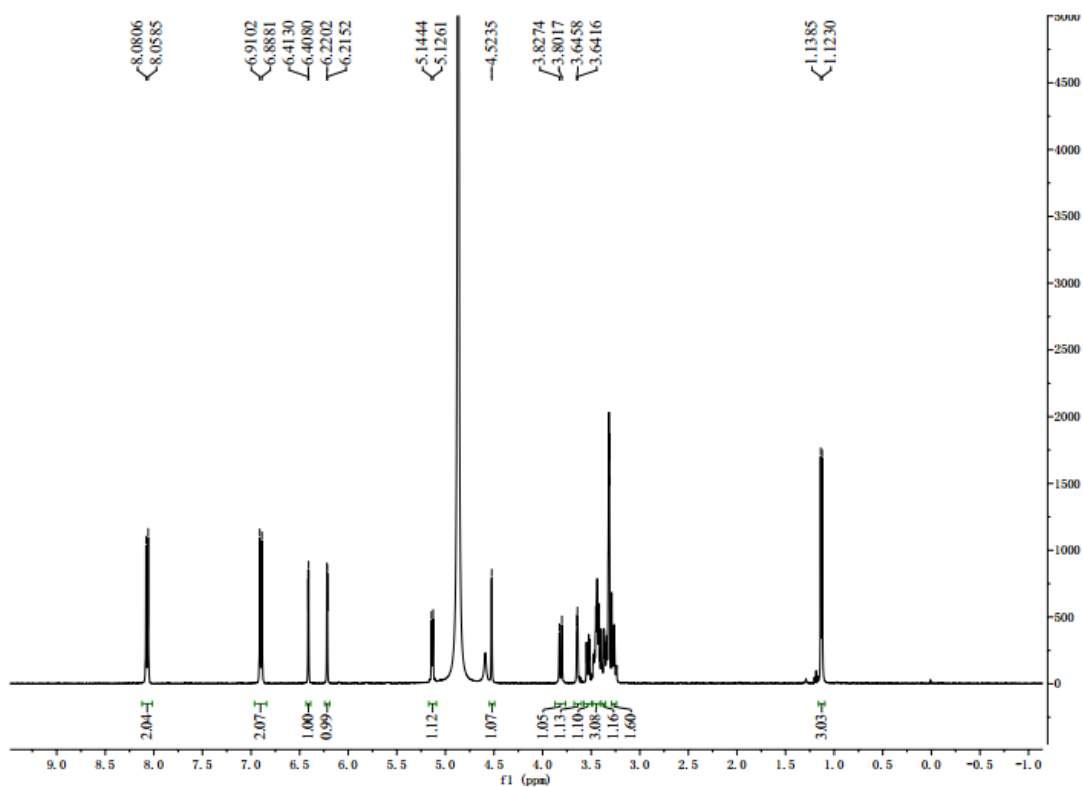

Figure S10. <sup>1</sup>H-NMR of Compound 3 (400MHz, CD<sub>3</sub>OD)



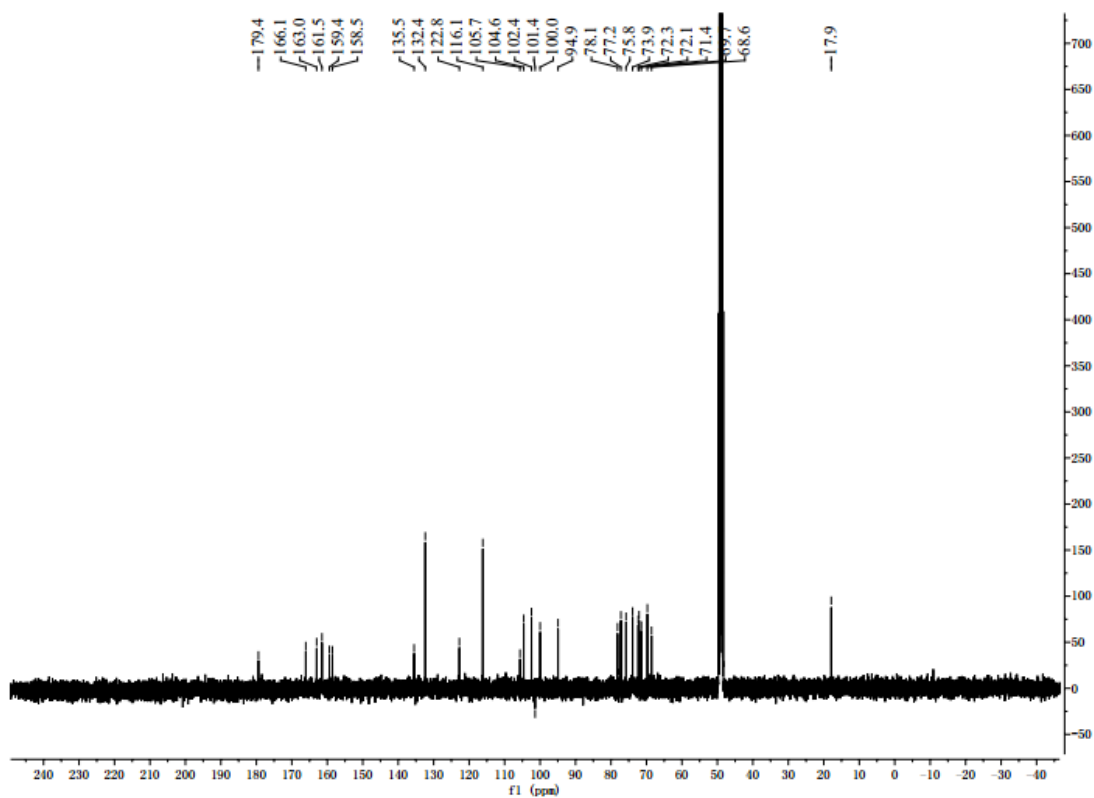

Figure S11.  $^{13}\text{C}$ -NMR of Compound 3 (100MHz,  $\text{CD}_3\text{OD}$ )

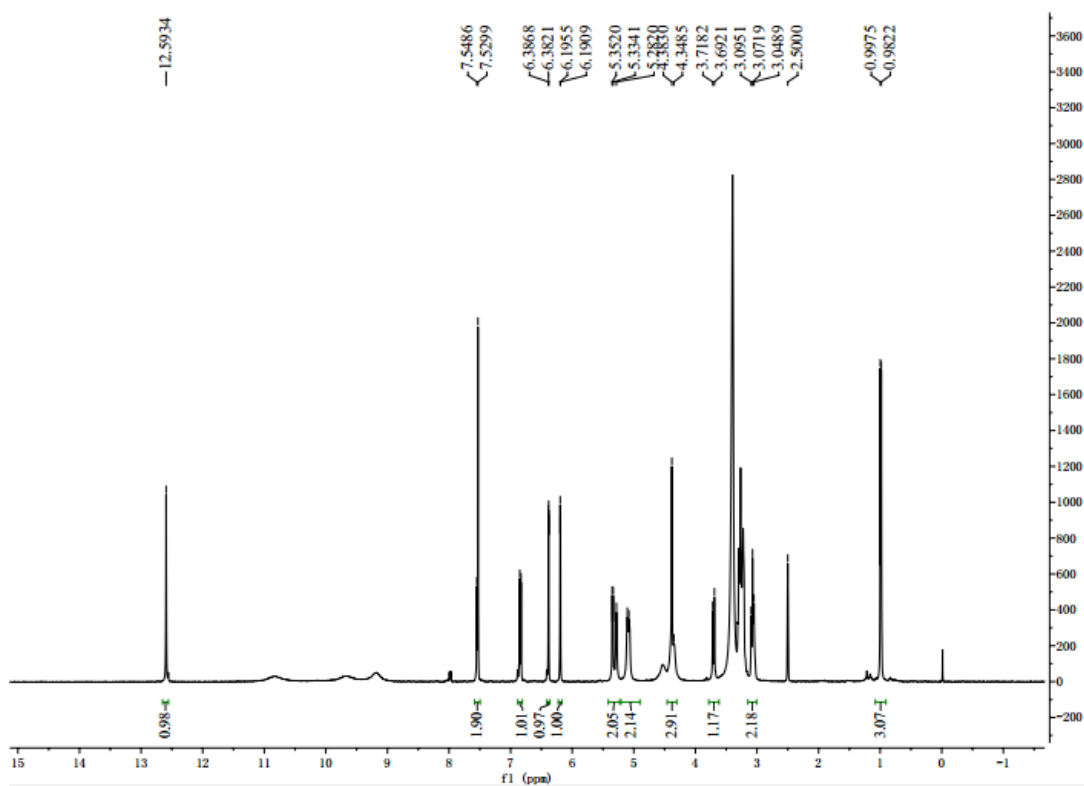

Figure S12.  $^1\text{H}$ -NMR of Compound 4 (400MHz,  $\text{DMSO-d}_6$ )

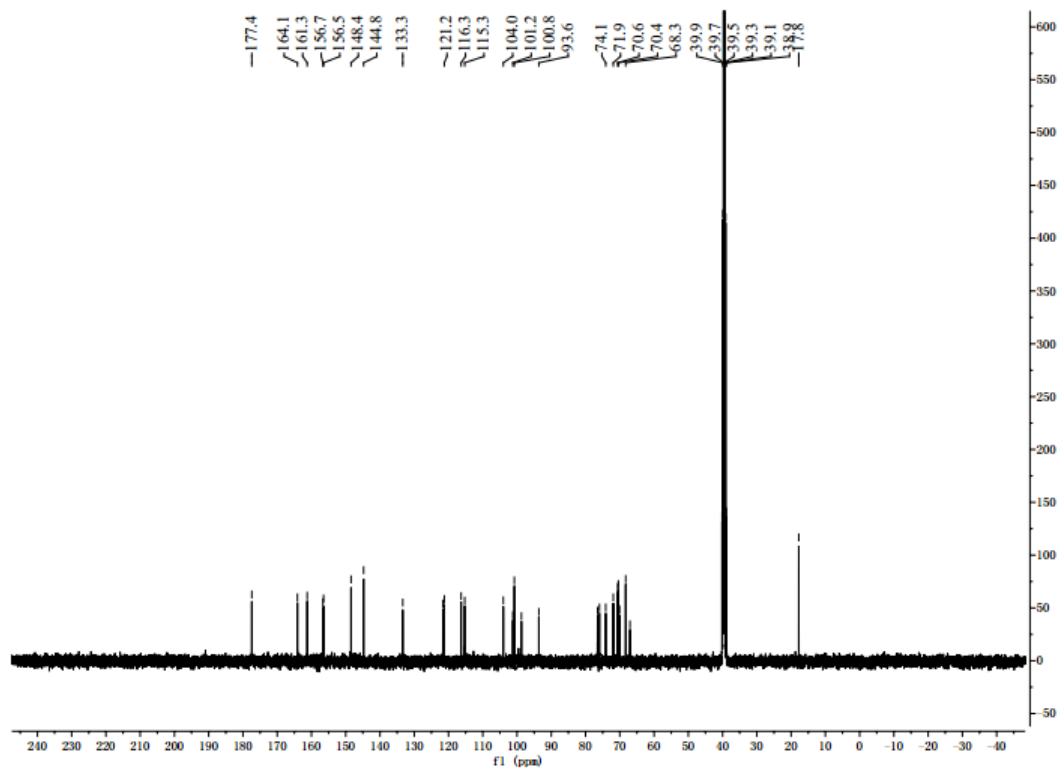

Figure S13.  $^{13}\text{C}$ -NMR of Compound 4 (100MHz,  $\text{DMSO-d}_6$ )

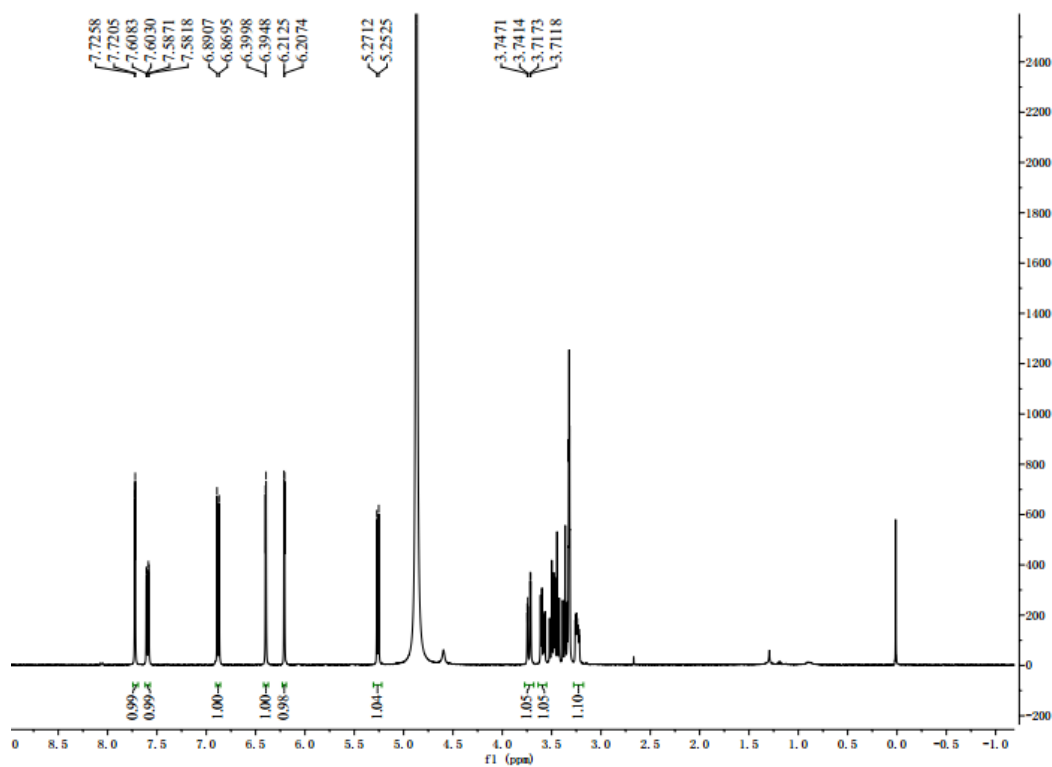

Figure S14.  $^1\text{H}$ -NMR of Compound 5 (400MHz,  $\text{CD}_3\text{OD}$ )

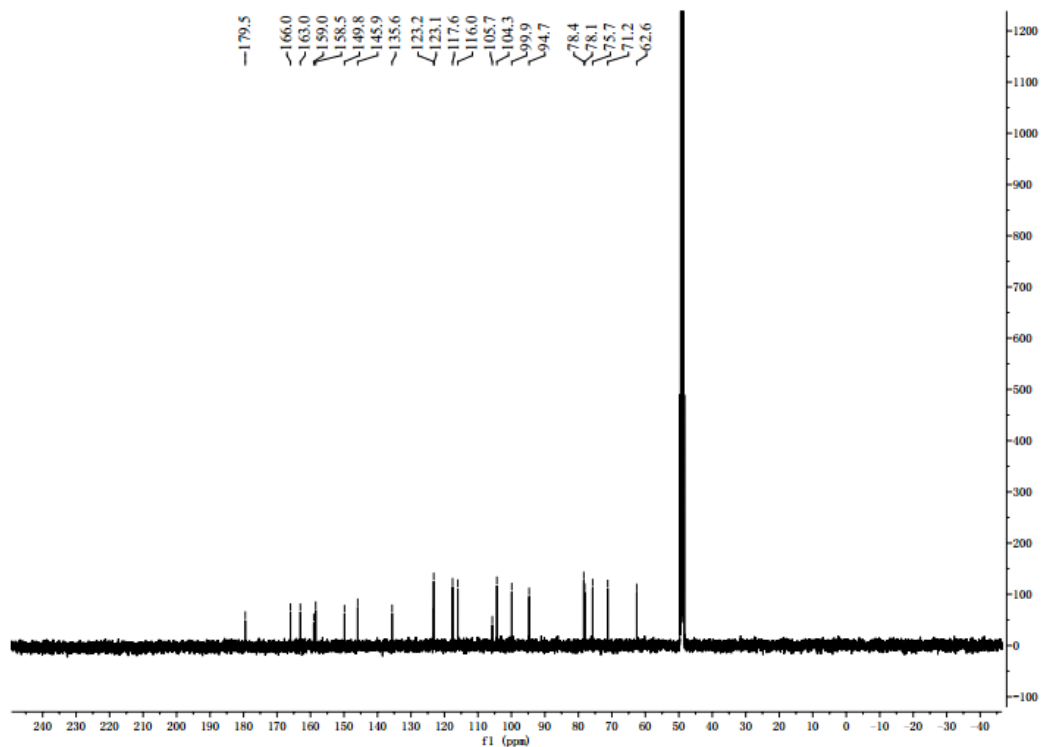

Figure S15.  $^{13}\text{C-NMR}$  of Compound 5 (100MHz,  $\text{CD}_3\text{OD}$ )

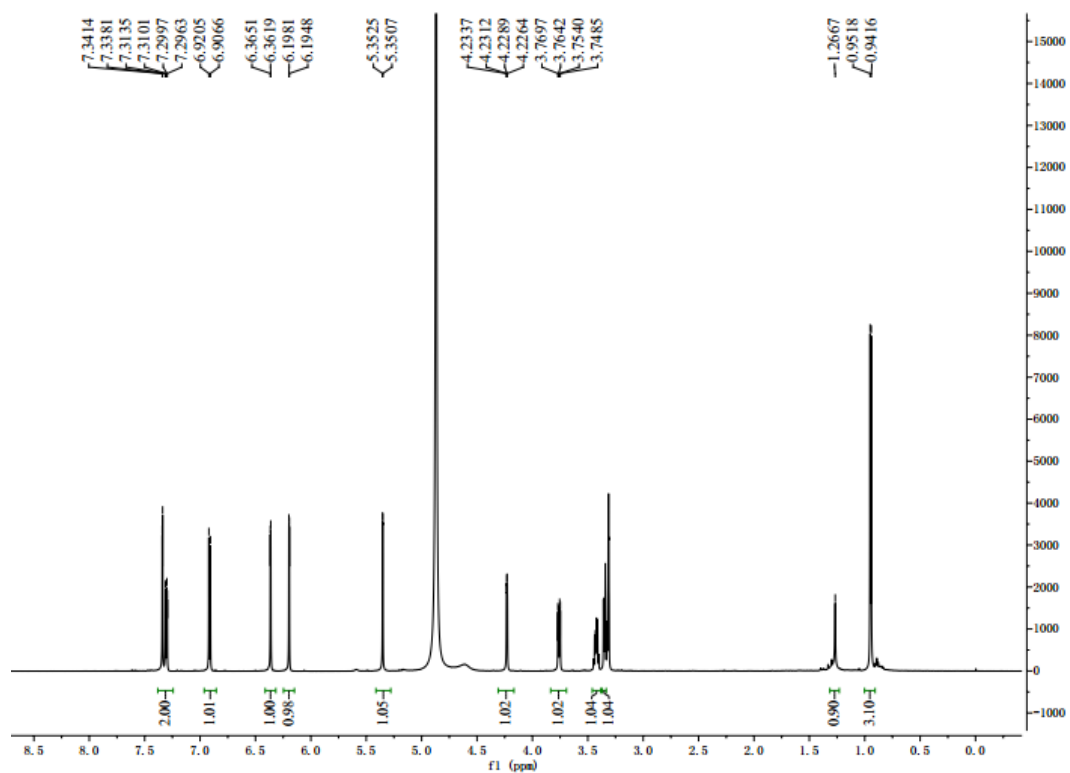

Figure S16.  $^1\text{H-NMR}$  of Compound 6 (400MHz,  $\text{CD}_3\text{OD}$ )

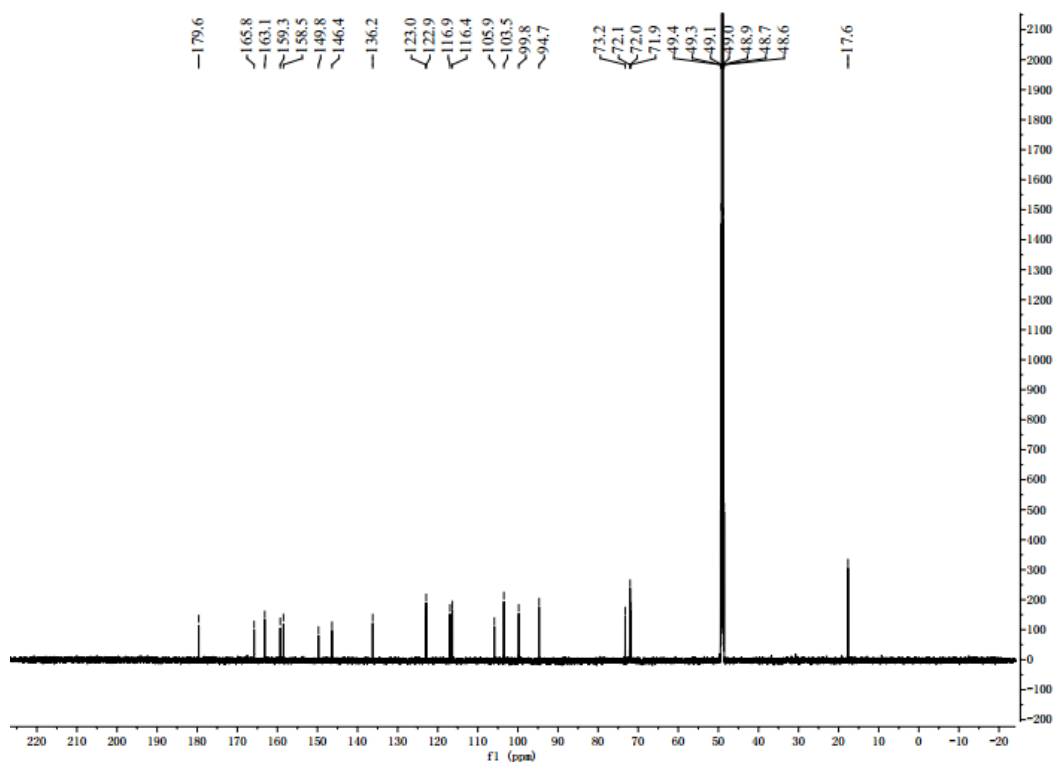

Figure S17.  $^{13}\text{C}$ -NMR of Compound 6 (100MHz,  $\text{CD}_3\text{OD}$ )

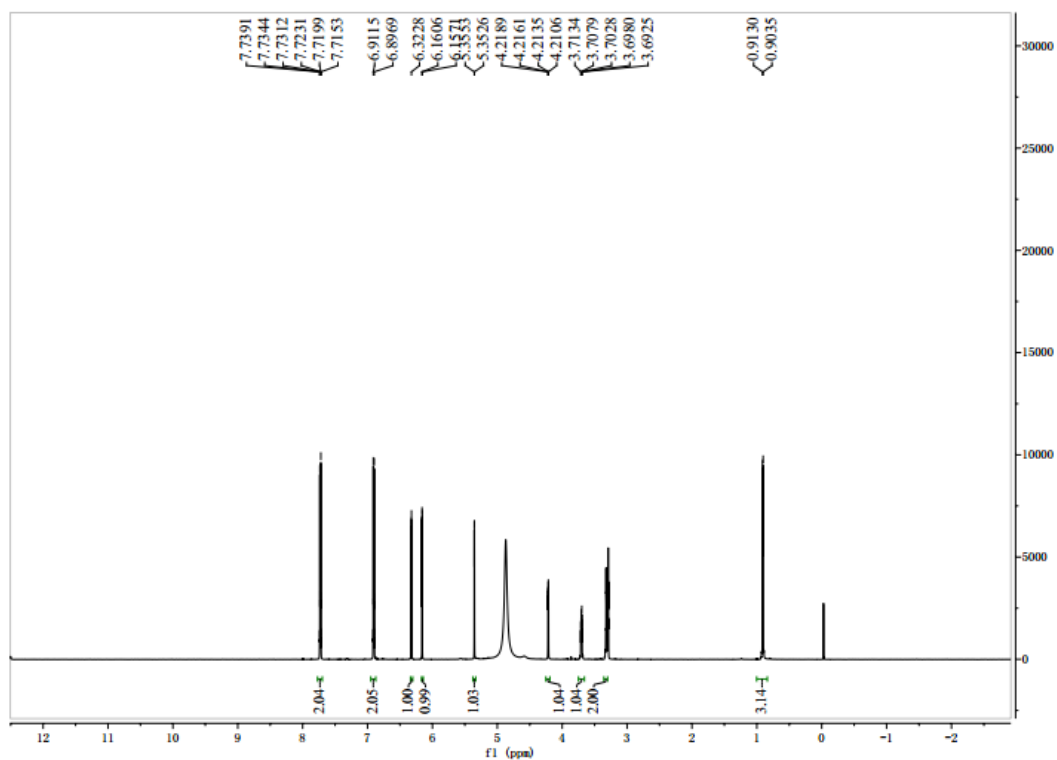

Figure S18.  $^1\text{H}$ -NMR of Compound 7 (400MHz,  $\text{CD}_3\text{OD}$ )

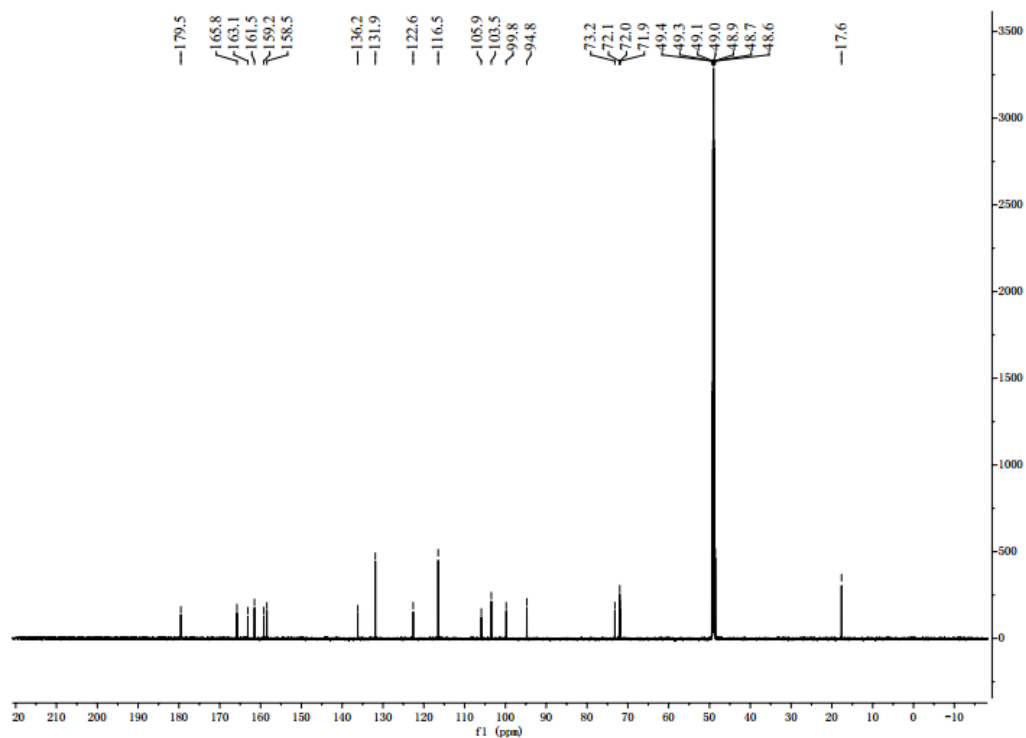

Figure S19.  $^{13}\text{C}$ -NMR of Compound 7 (100MHz,  $\text{CD}_3\text{OD}$ )

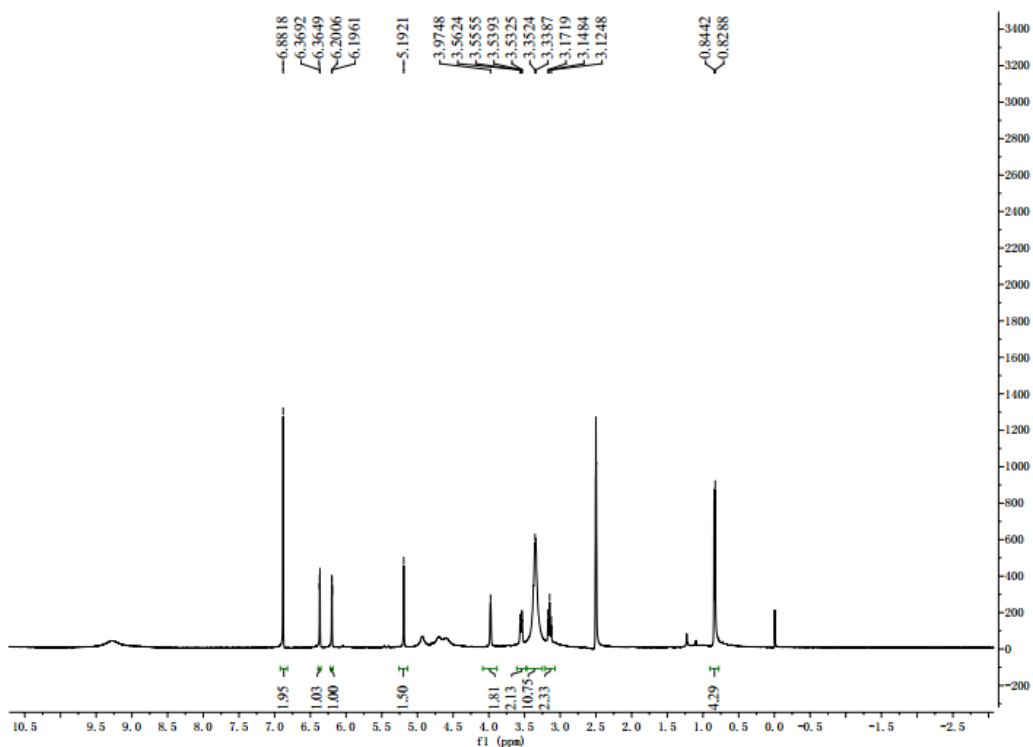

Figure S20.  $^1\text{H}$ -NMR of Compound 8 (400MHz,  $\text{DMSO-d}_6$ )

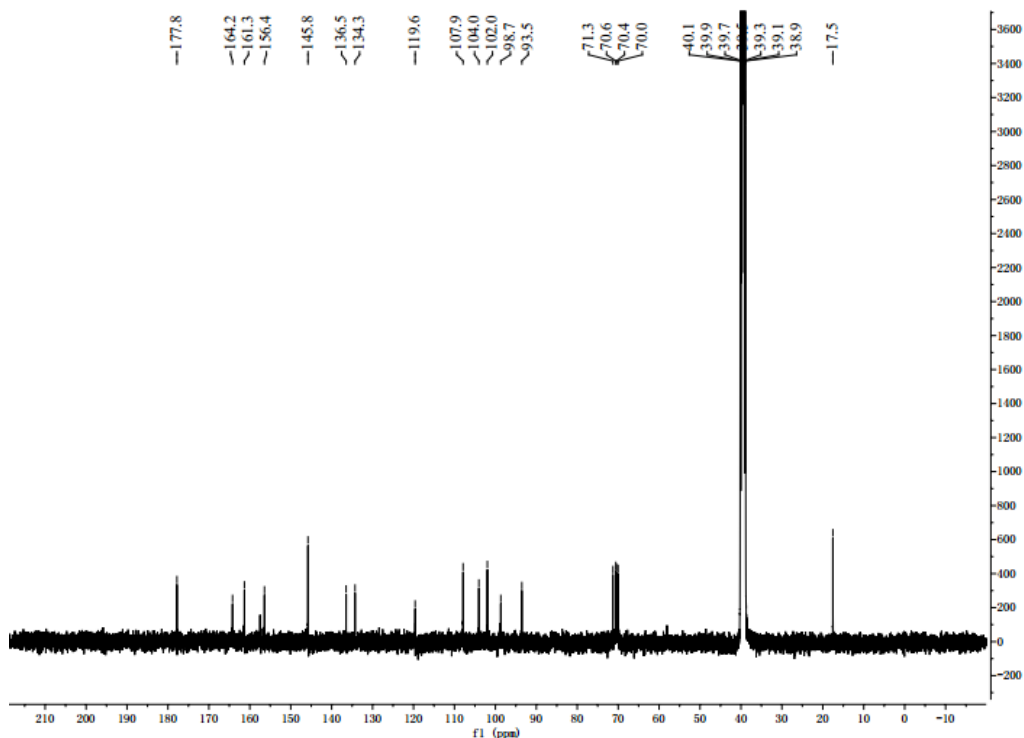

Figure S21.  $^{13}\text{C}$ -NMR of Compound 8 (100MHz, DMSO- $d_6$ )

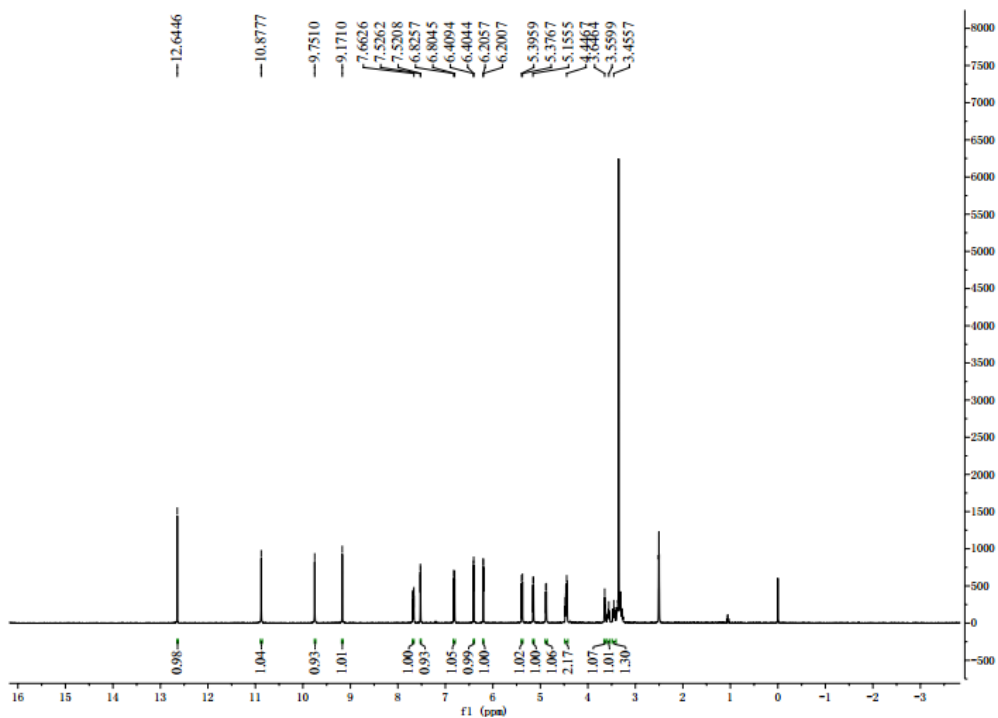

Figure S22.  $^1\text{H}$ -NMR of Compound 9 (400MHz, DMSO- $d_6$ )

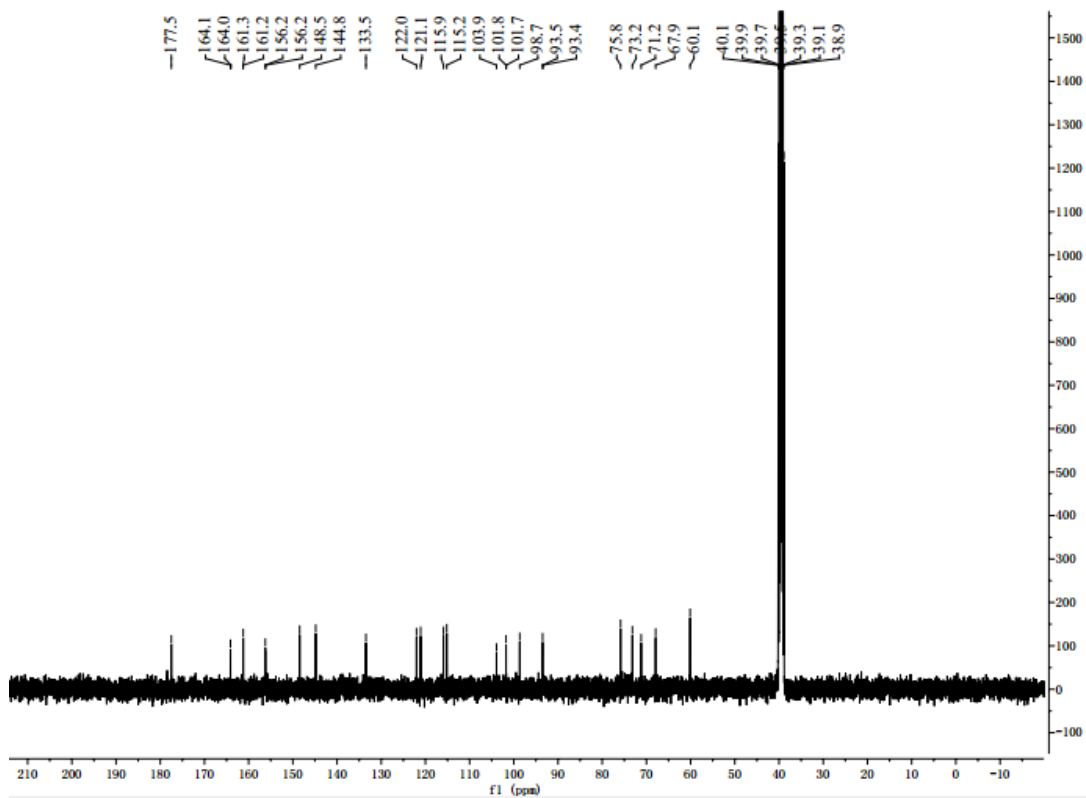

Figure S23.  $^{13}\text{C}$ -NMR of Compound 9 (100MHz,  $\text{DMSO-d}_6$ )

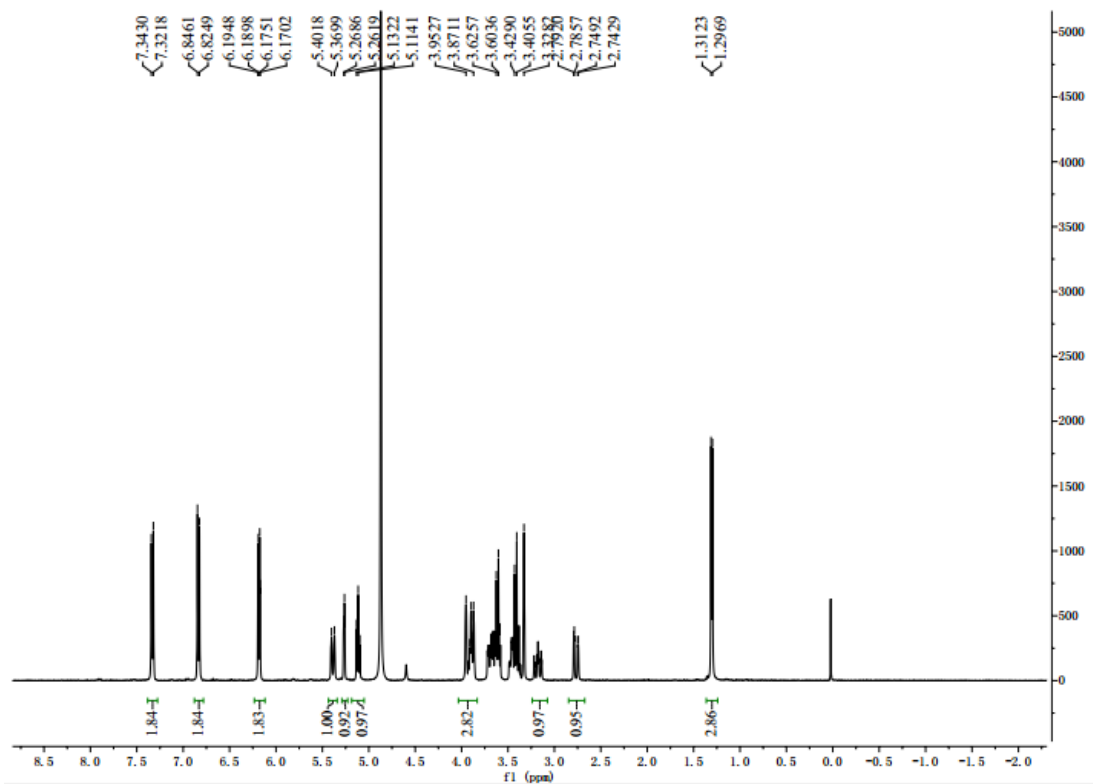

Figure S24.  $^1\text{H}$ -NMR of Compound 10 (400MHz,  $\text{CD}_3\text{OD}$ )

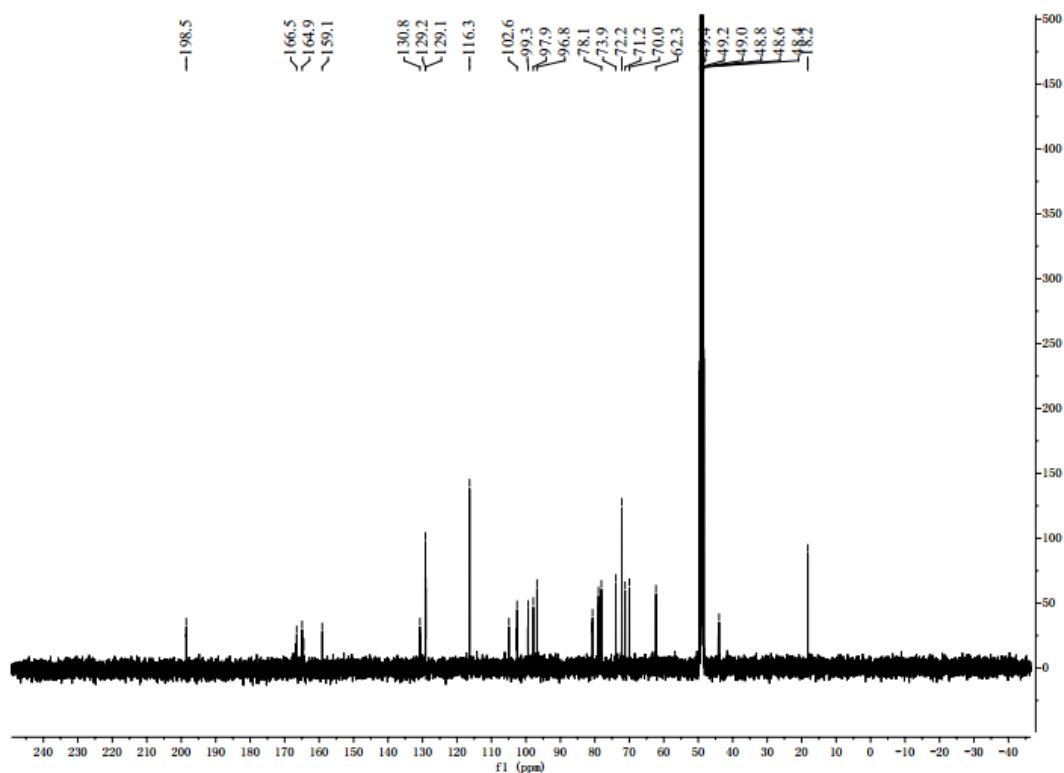

Figure S25.  $^{13}\text{C}$ -NMR of Compound 10 (100MHz,  $\text{CD}_3\text{OD}$ )

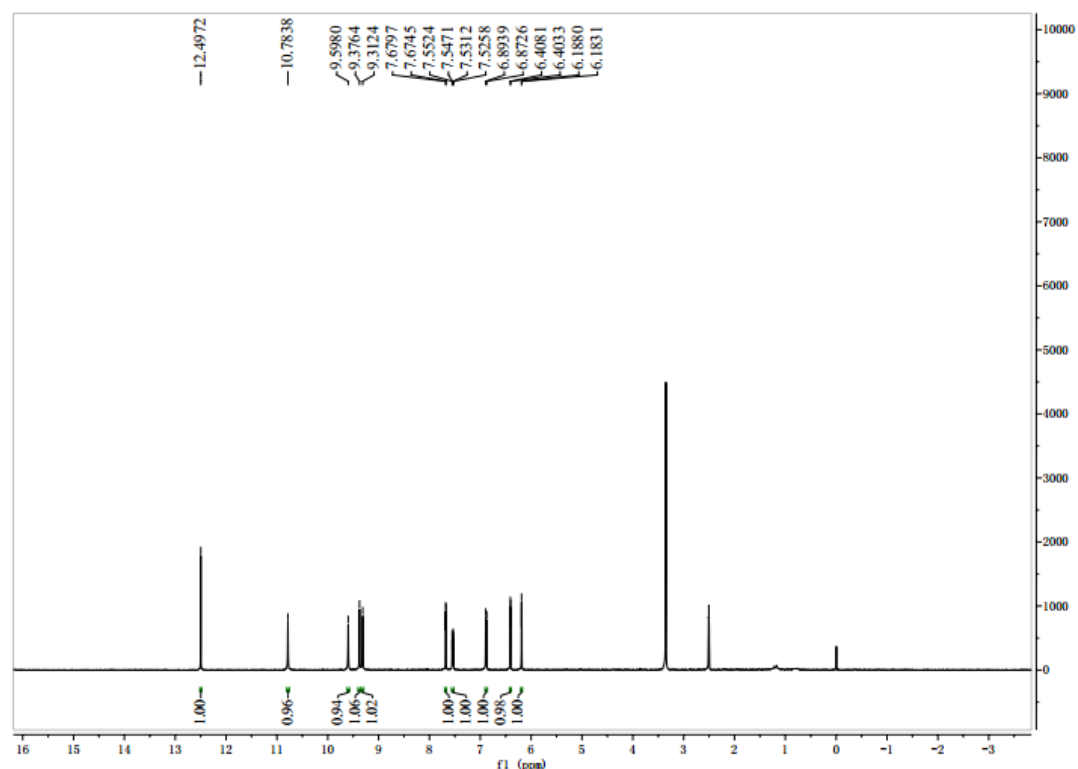

Figure S26.  $^1\text{H}$ -NMR of Compound 11 (400MHz,  $\text{DMSO-d}_6$ )



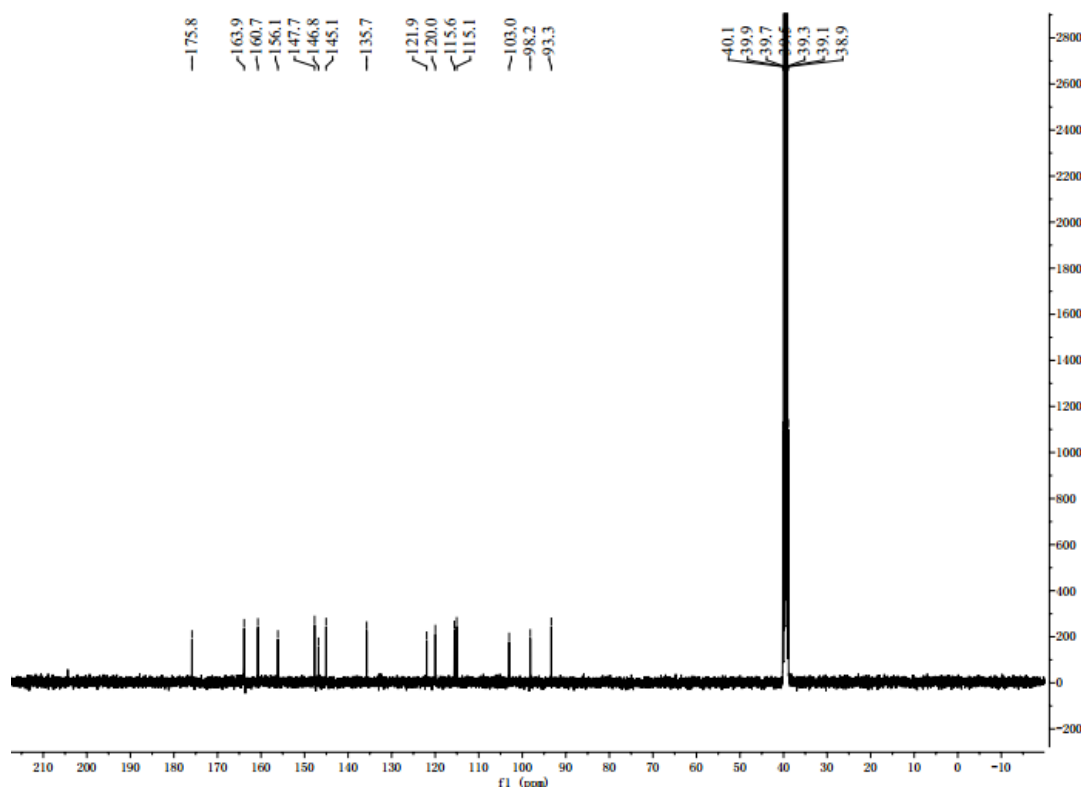

Figure S27.  $^{13}\text{C}$ -NMR of Compound 11 (100MHz,  $\text{DMSO-d}_6$ )

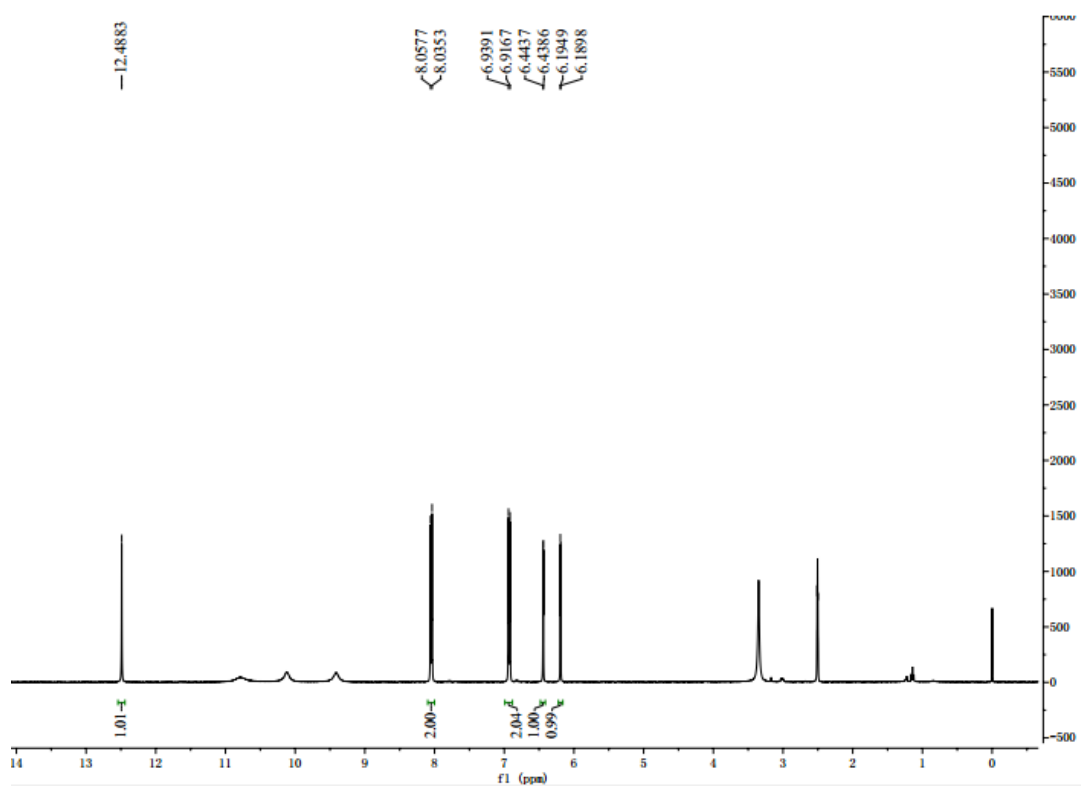

Figure S28.  $^1\text{H}$ -NMR of Compound 12 (400MHz,  $\text{DMSO-d}_6$ )

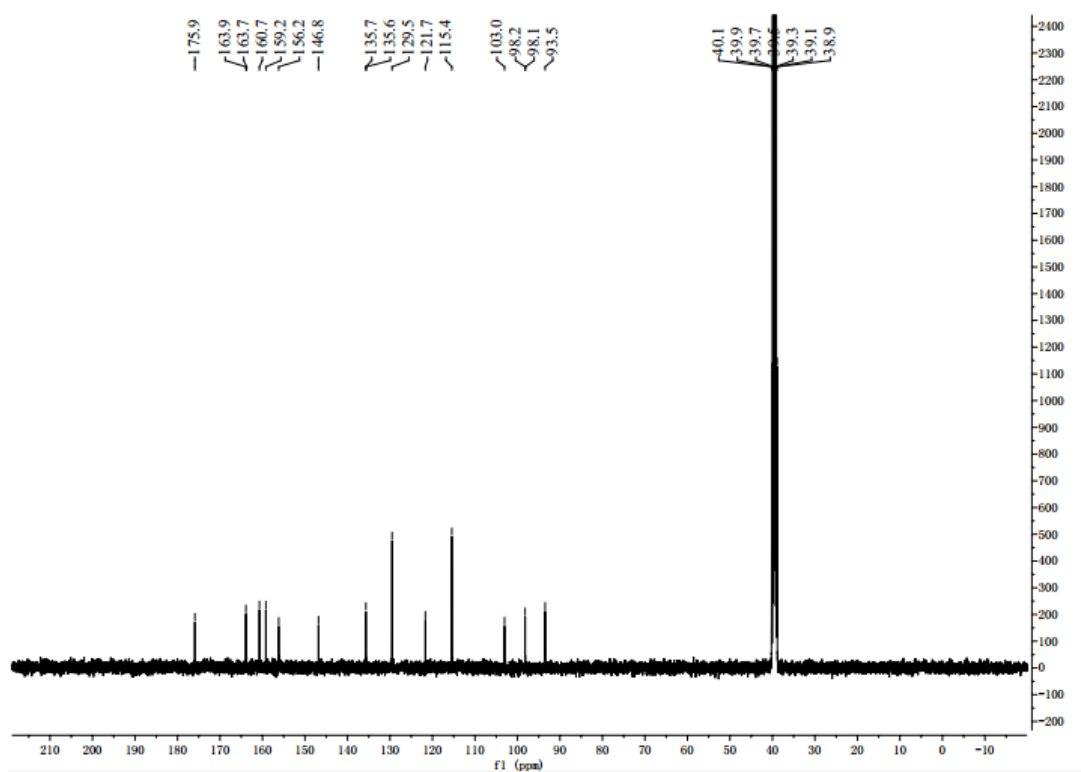

Figure S29.  $^{13}\text{C}$ -NMR of Compound 12 (100MHz,  $\text{DMSO-d}_6$ )

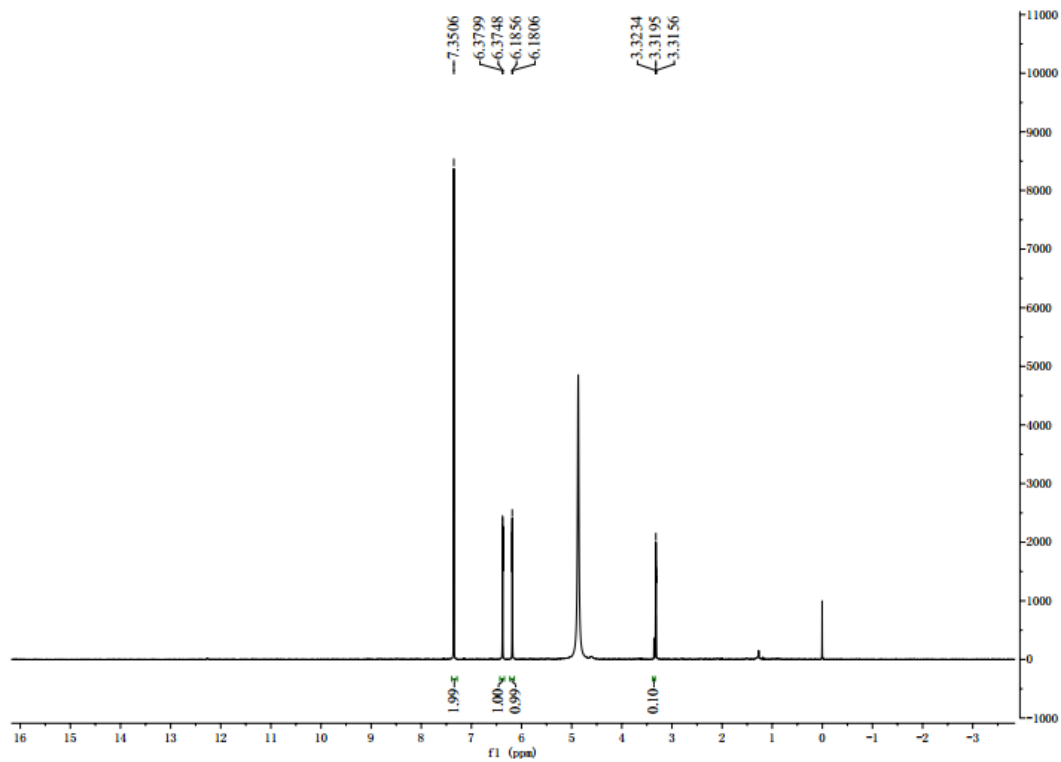

Figure S30.  $^1\text{H}$ -NMR of Compound 13 (400MHz,  $\text{CD}_3\text{OD}$ )

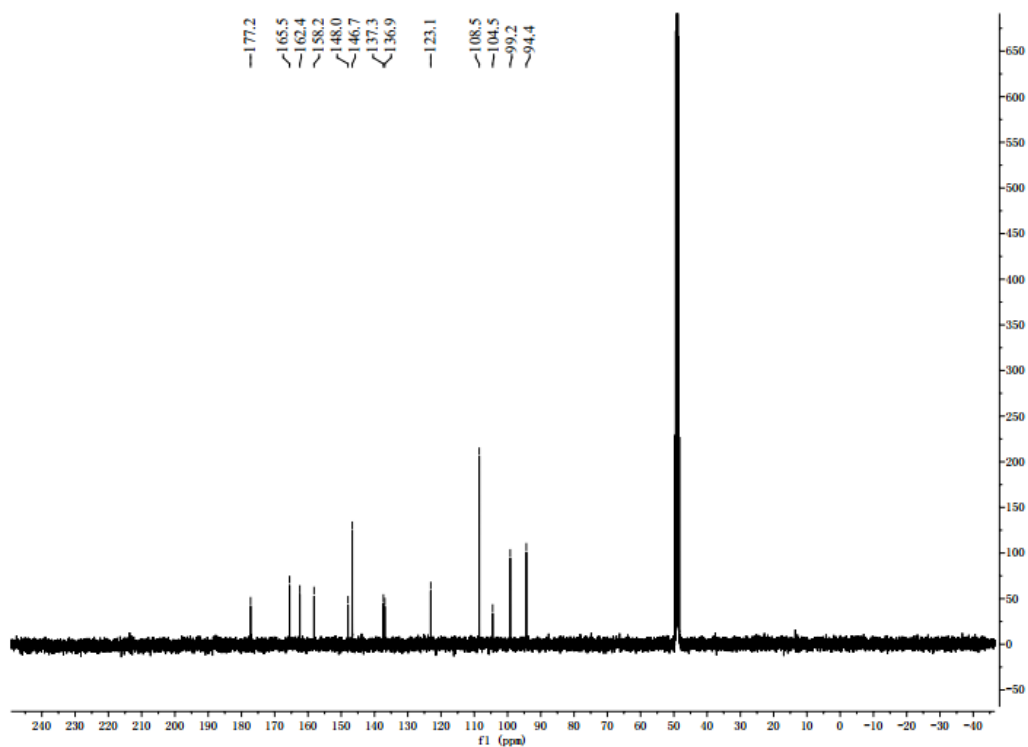

Figure S31.  $^{13}\text{C}$ -NMR of Compound 13 (100MHz,  $\text{CD}_3\text{OD}$ )

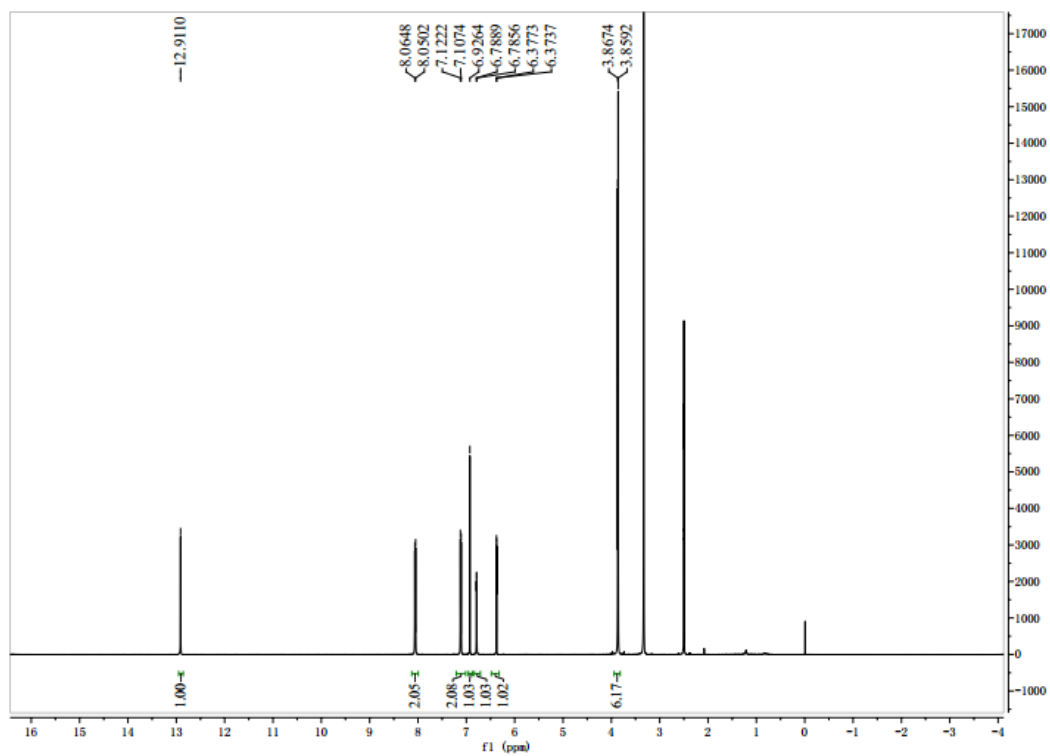

Figure S32.  $^1\text{H}$ -NMR of Compound 14 (400MHz,  $\text{DMSO-d}_6$ )

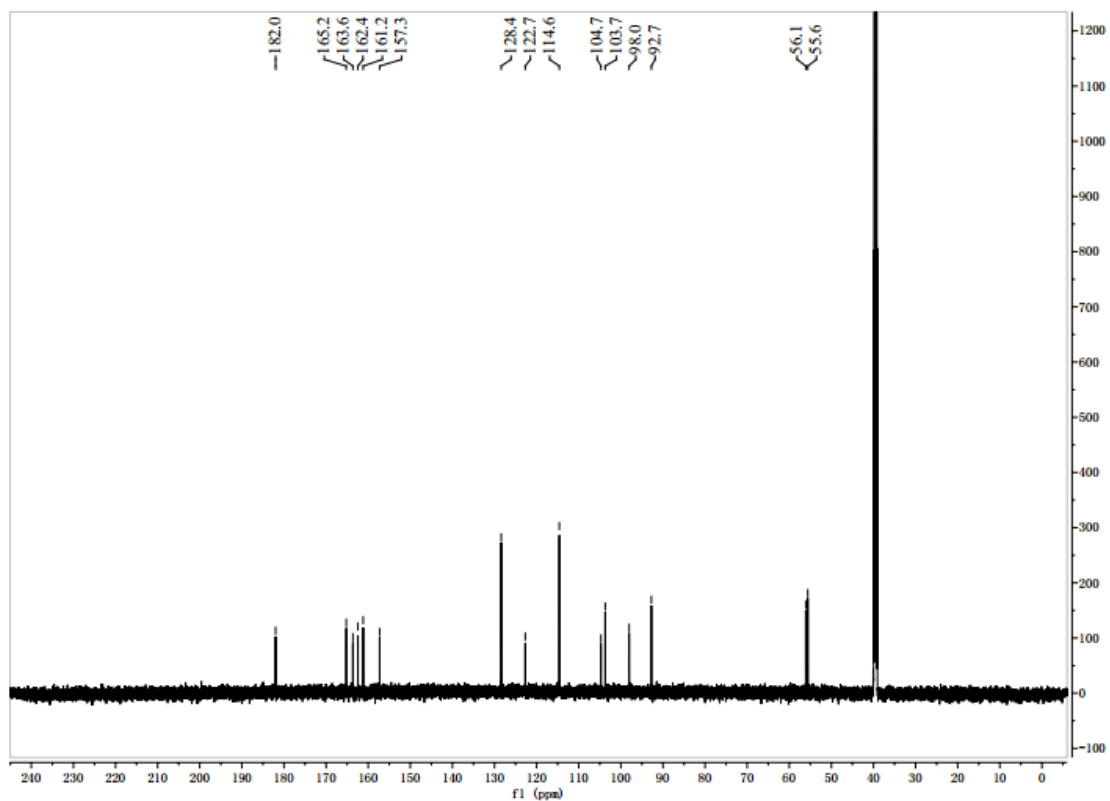

Figure S33.  $^{13}\text{C}$ -NMR of Compound 14 (100MHz,  $\text{DMSO-d}_6$ )

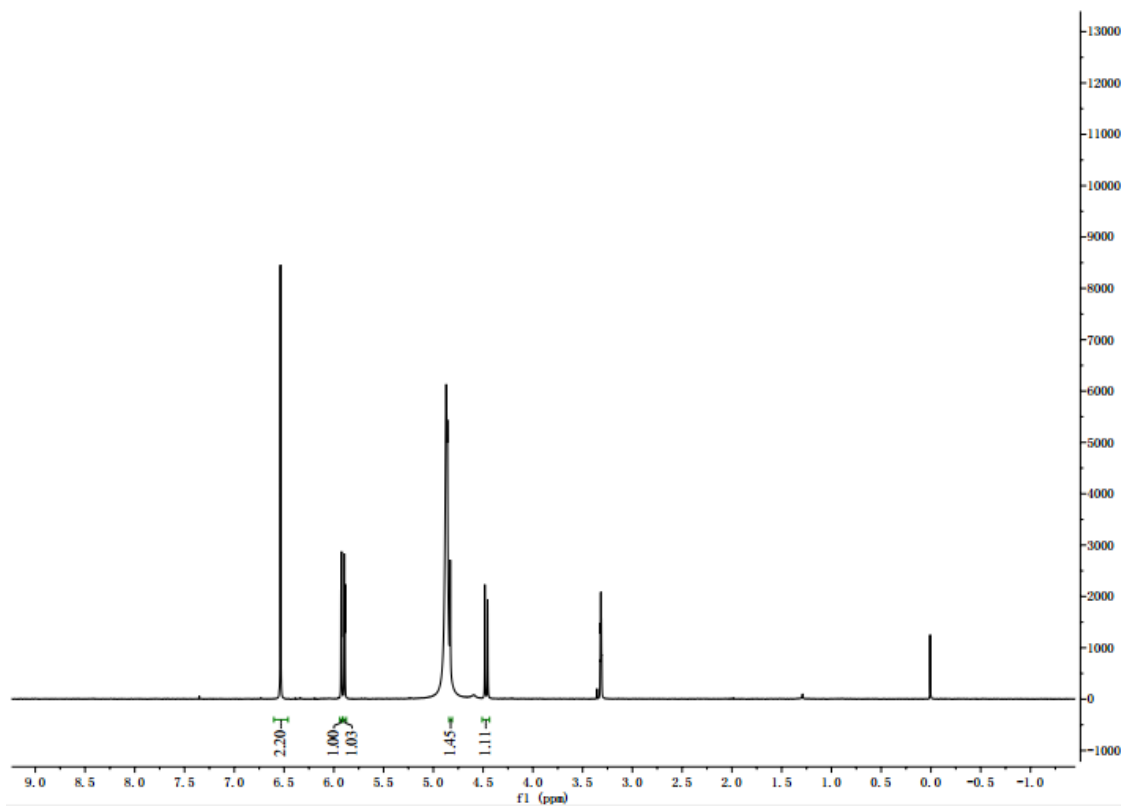

Figure S34.  $^1\text{H}$ -NMR of Compound 15 (400MHz,  $\text{CD}_3\text{OD}$ )

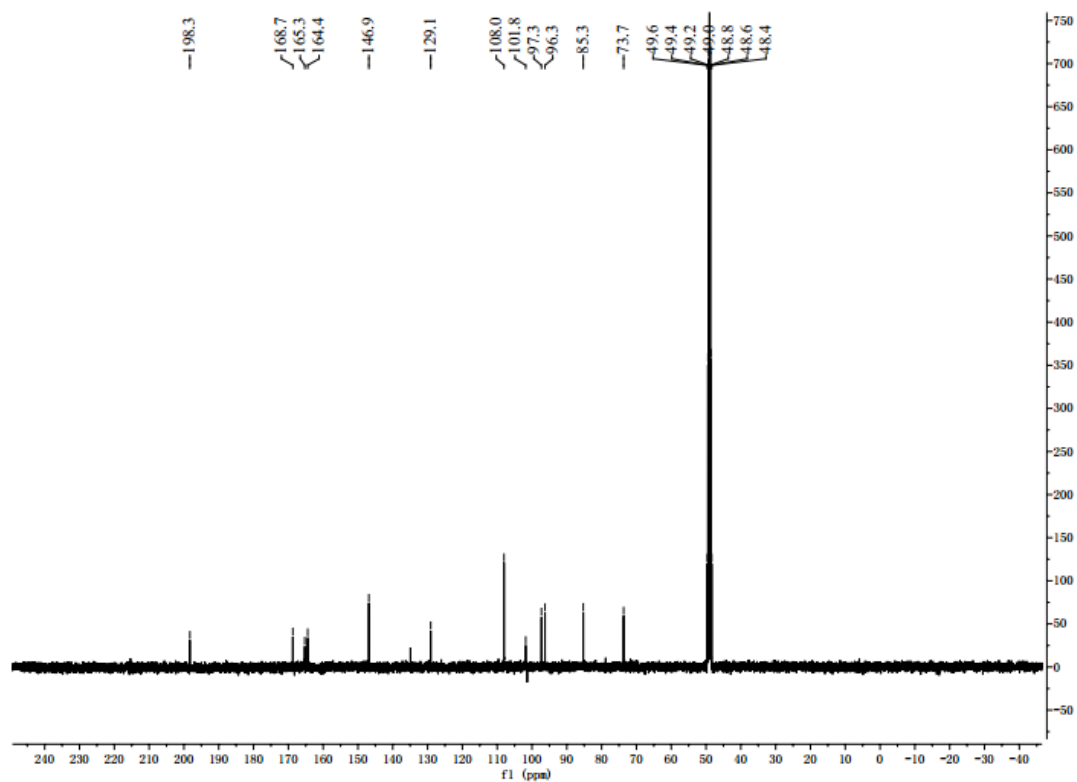

Figure S35.  $^{13}\text{C}$ -NMR of Compound 15 (100MHz,  $\text{CD}_3\text{OD}$ )

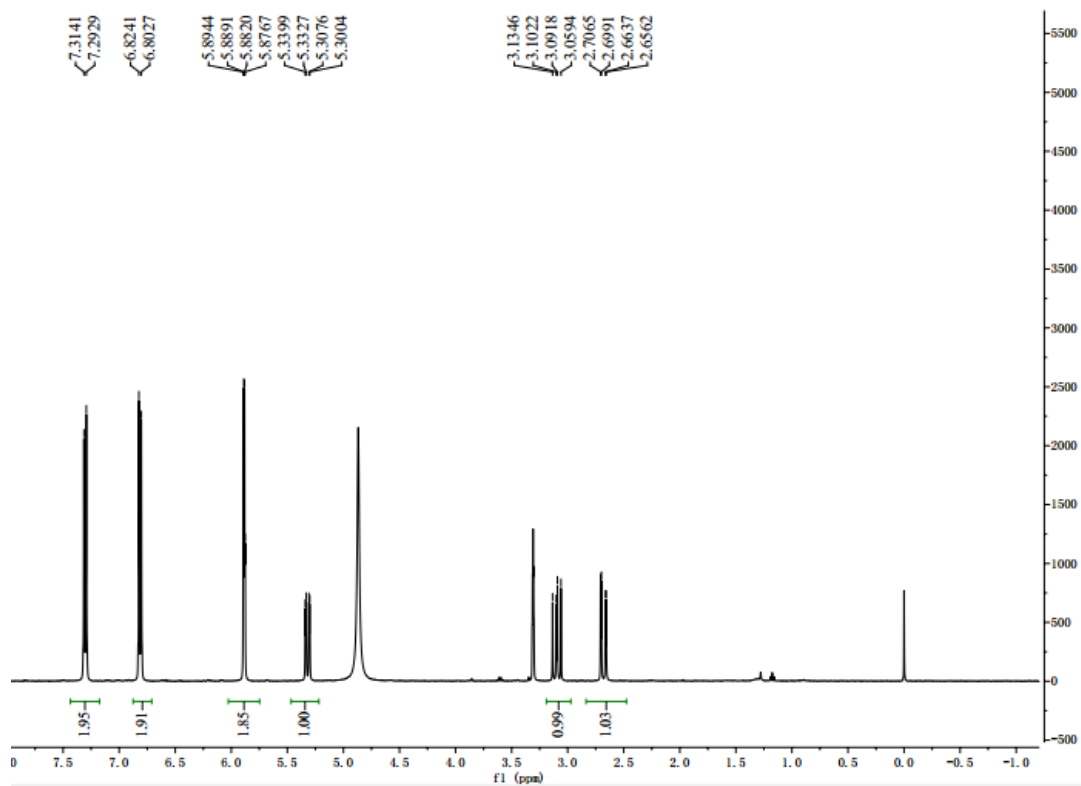

Figure S36.  $^1\text{H}$ -NMR of Compound 16 (400MHz,  $\text{CD}_3\text{OD}$ )

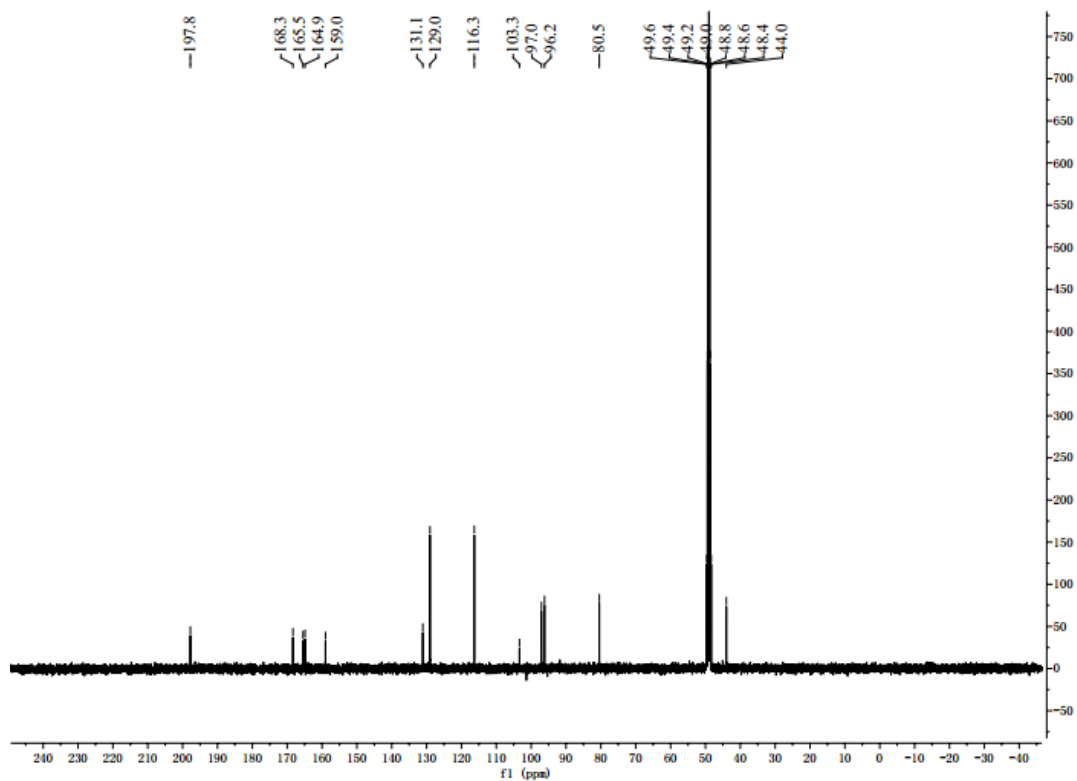

Figure S37.  $^{13}\text{C}$ -NMR of Compound 16 (100MHz,  $\text{CD}_3\text{OD}$ )

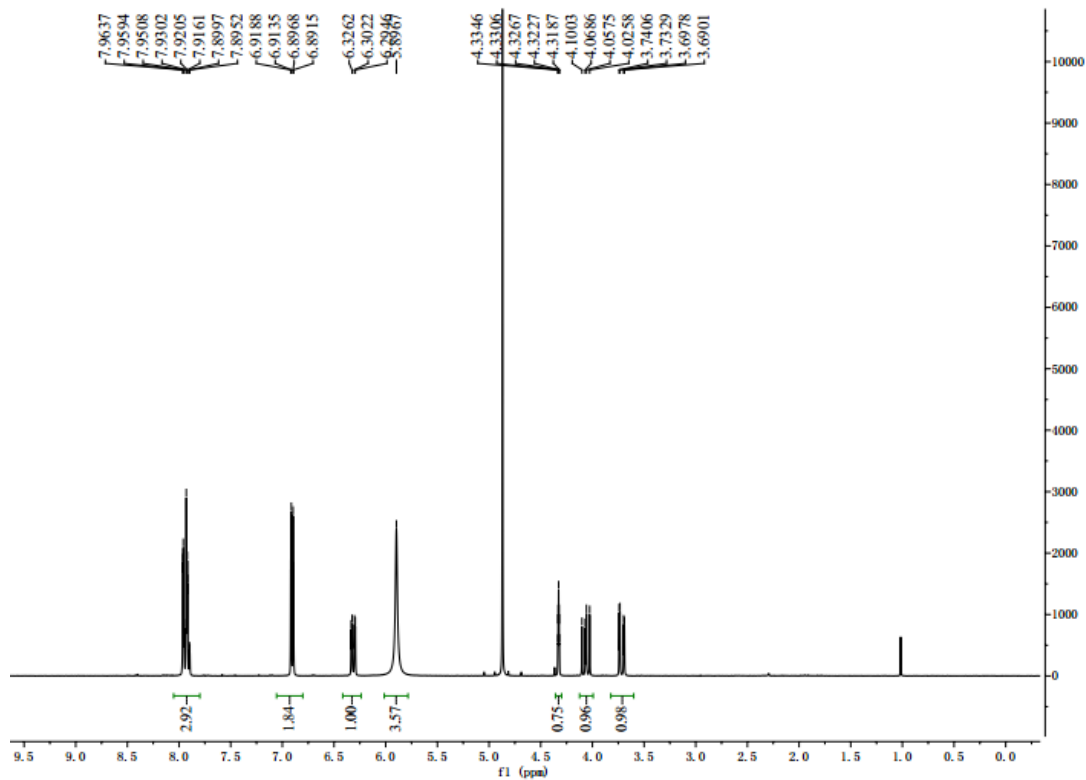

Figure S38.  $^1\text{H}$ -NMR of Compound 17 (400MHz,  $\text{CD}_3\text{OD}$ )

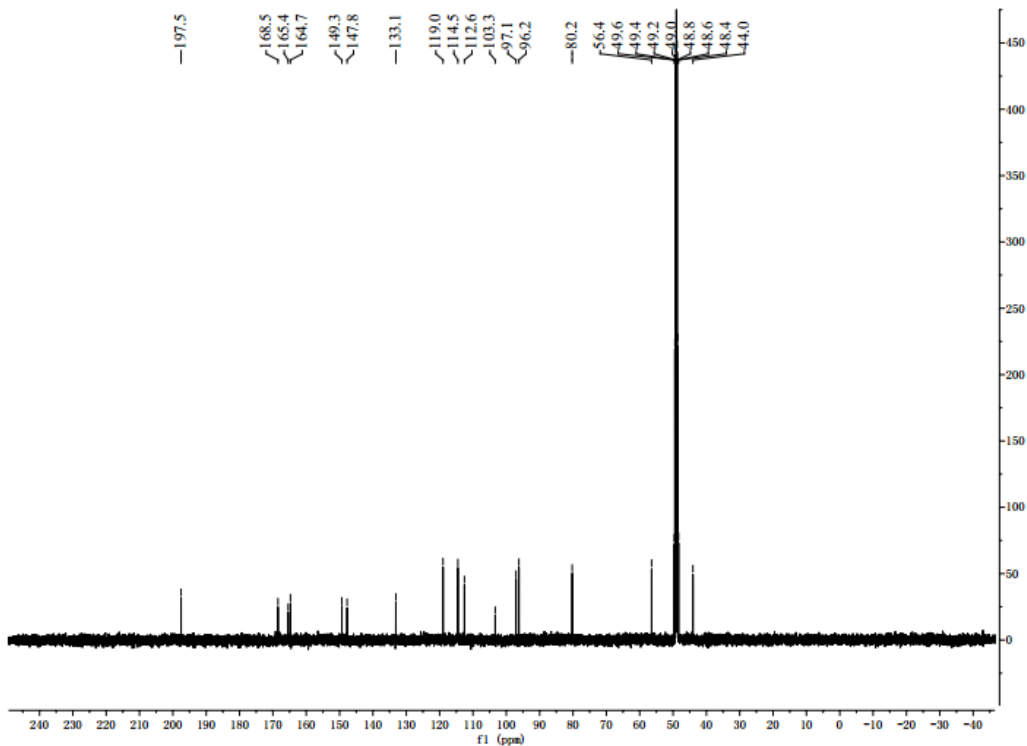

Figure S39.  $^{13}\text{C}$ -NMR of Compound 17 (100MHz,  $\text{CD}_3\text{OD}$ )

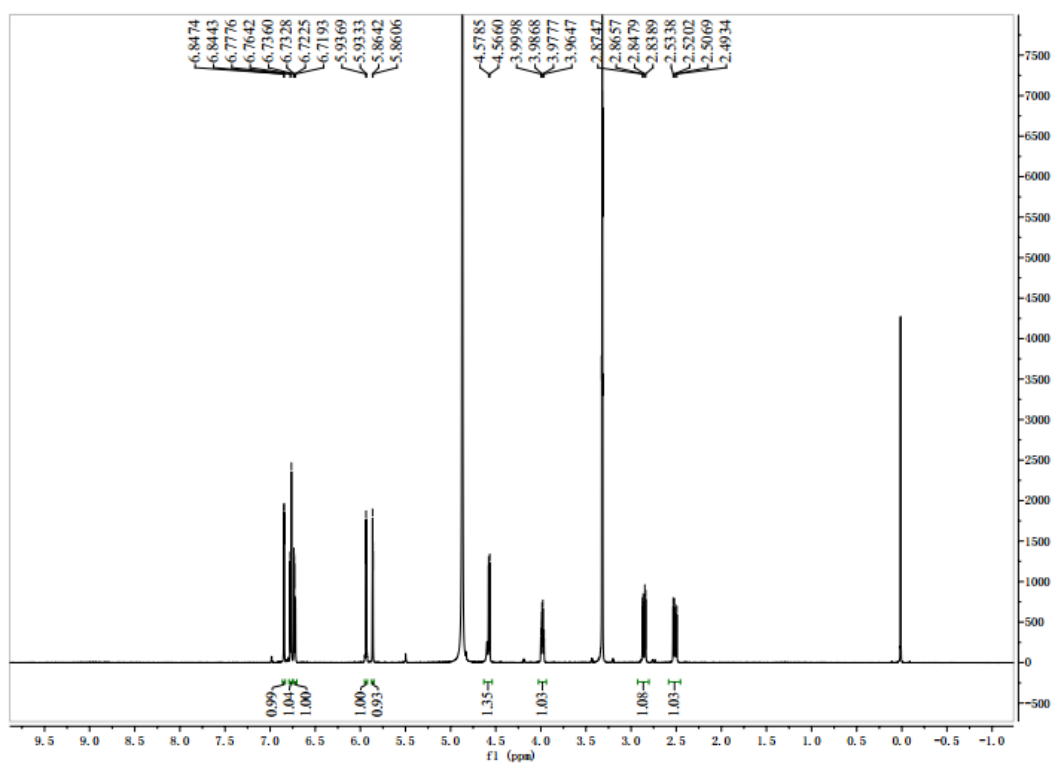

Figure S40.  $^1\text{H}$ -NMR of Compound 18 (400MHz,  $\text{CD}_3\text{OD}$ )

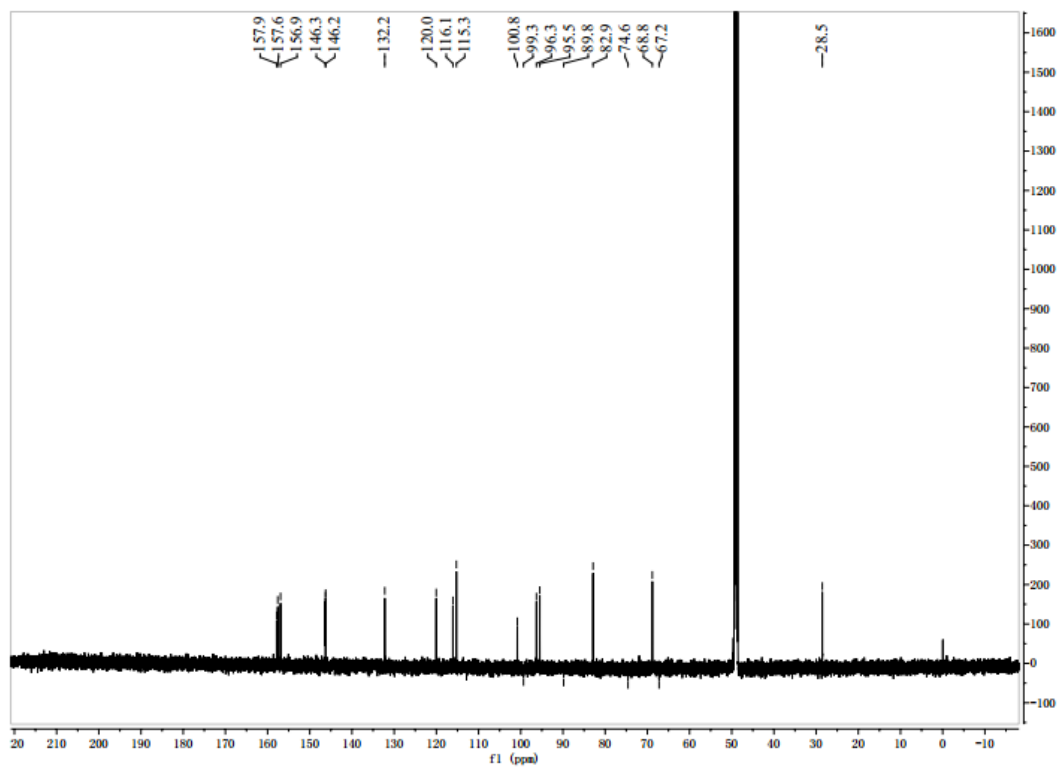

Figure S41.  $^{13}\text{C}$ -NMR of Compound 18 (100MHz,  $\text{CD}_3\text{OD}$ )

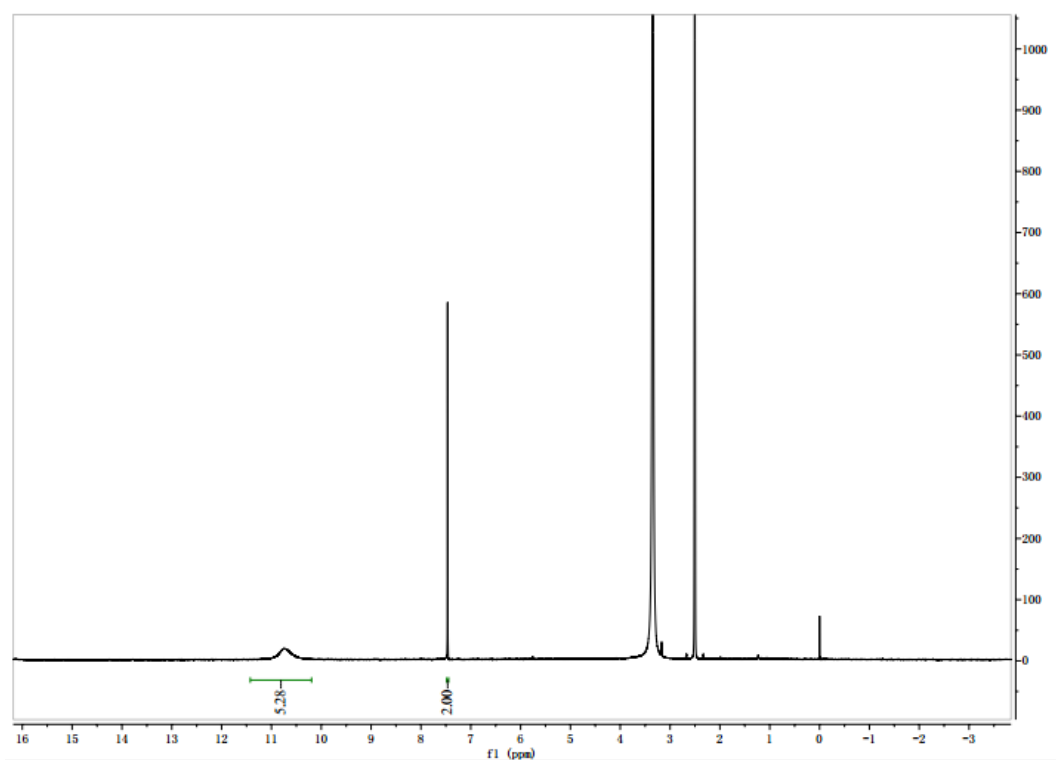

Figure S42.  $^1\text{H}$ -NMR of Compound 19 (400MHz,  $\text{DMSO-d}_6$ )



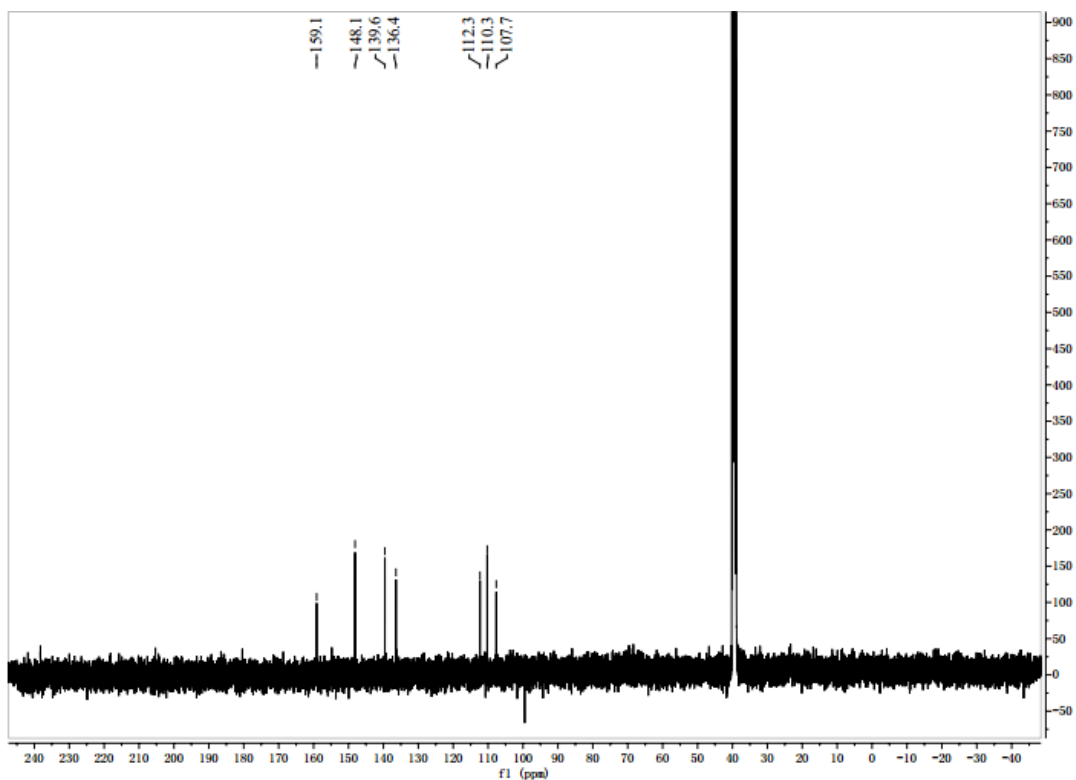

Figure S43.  $^{13}\text{C}$ -NMR of Compound 19 (100MHz, DMSO- $d_6$ )

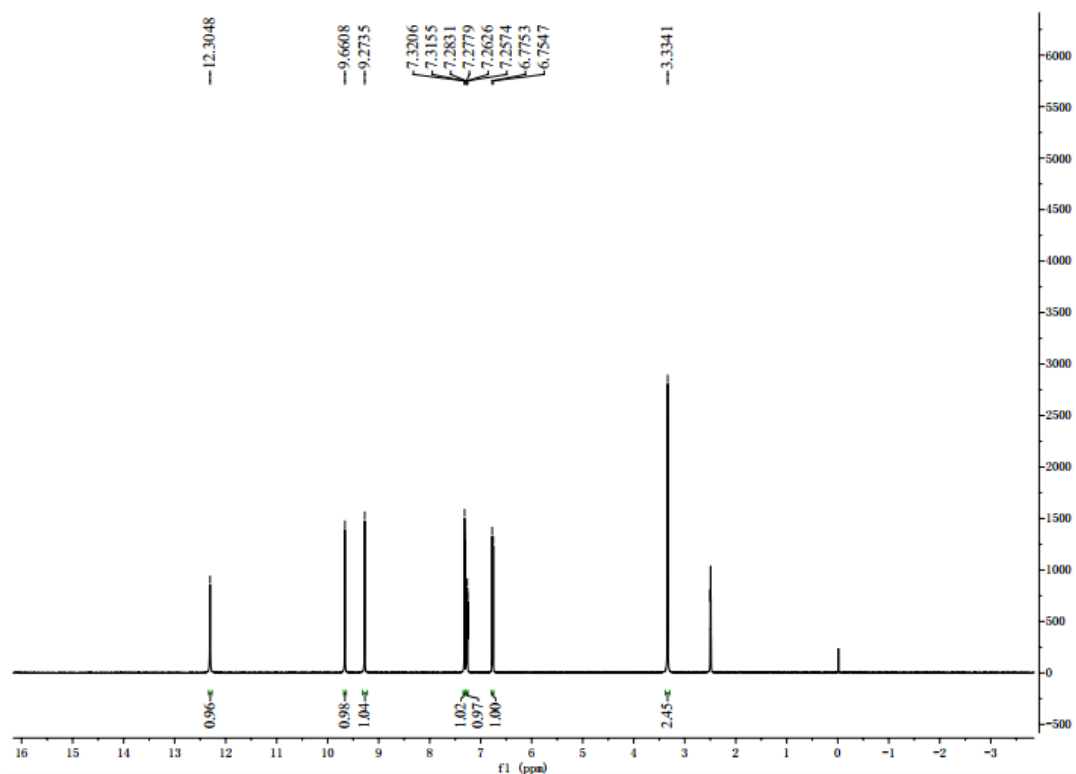

Figure S44.  $^1\text{H}$ -NMR of Compound 20 (400MHz, DMSO- $d_6$ )

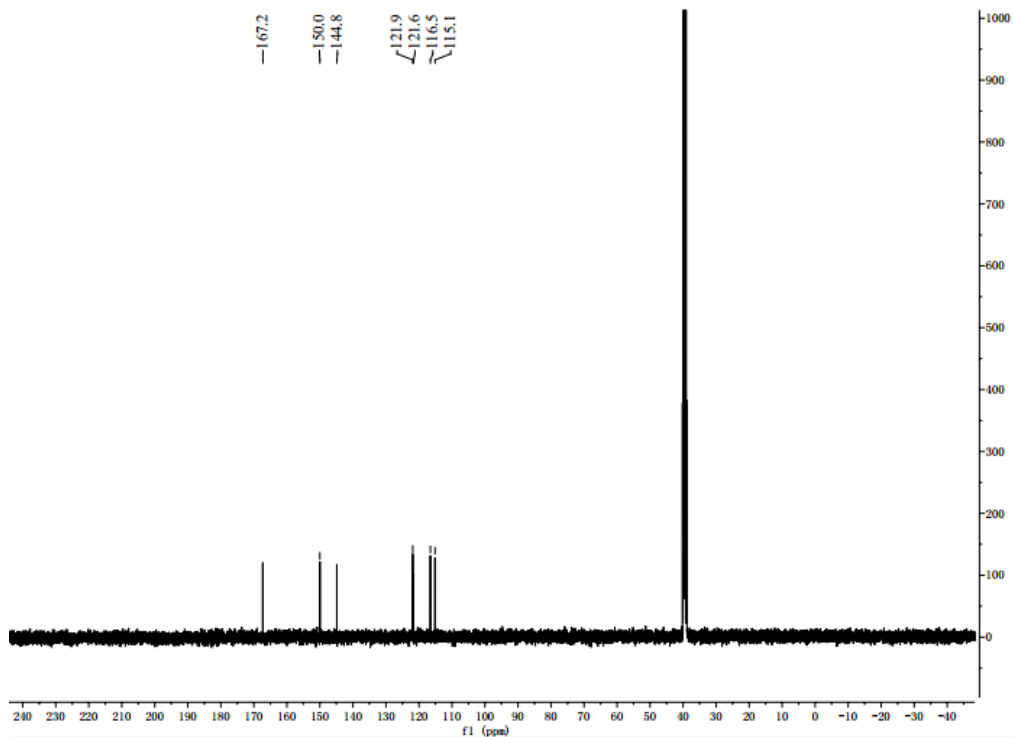

Figure S45. <sup>13</sup>C-NMR of Compound 20 (100MHz, DMSO-d<sub>6</sub>)

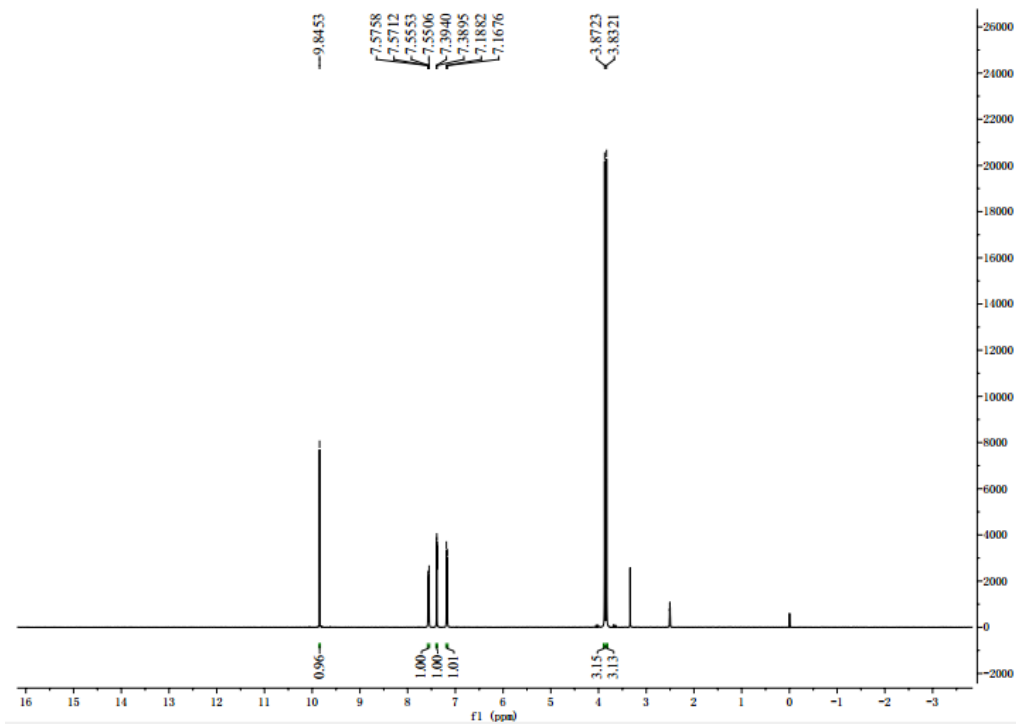

Figure S46. <sup>1</sup>H-NMR of Compound 21 (400MHz, DMSO-d<sub>6</sub>)

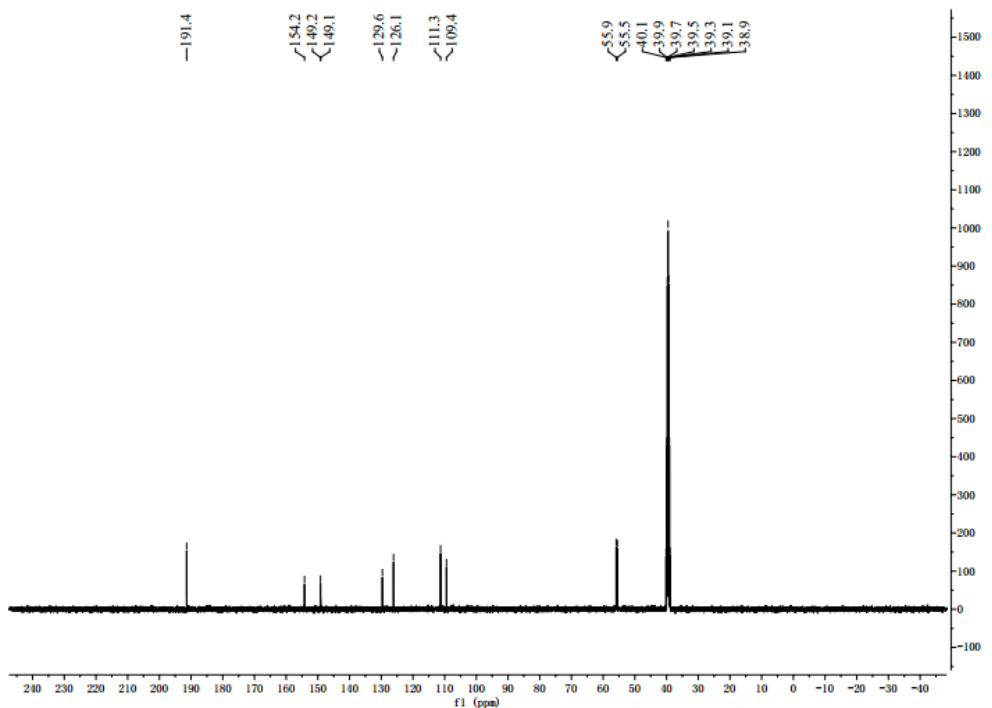

Figure S47. <sup>13</sup>C-NMR of Compound 21 (100MHz, DMSO-d<sub>6</sub>)

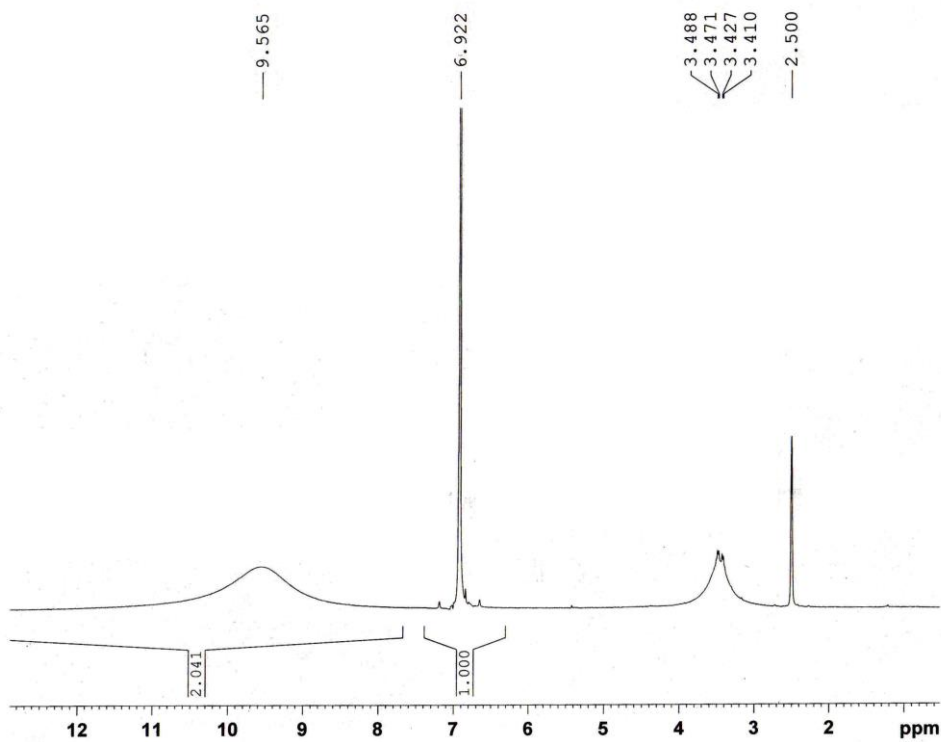

Figure S48. <sup>1</sup>H-NMR of Compound 22 (400MHz, DMSO-d<sub>6</sub>)

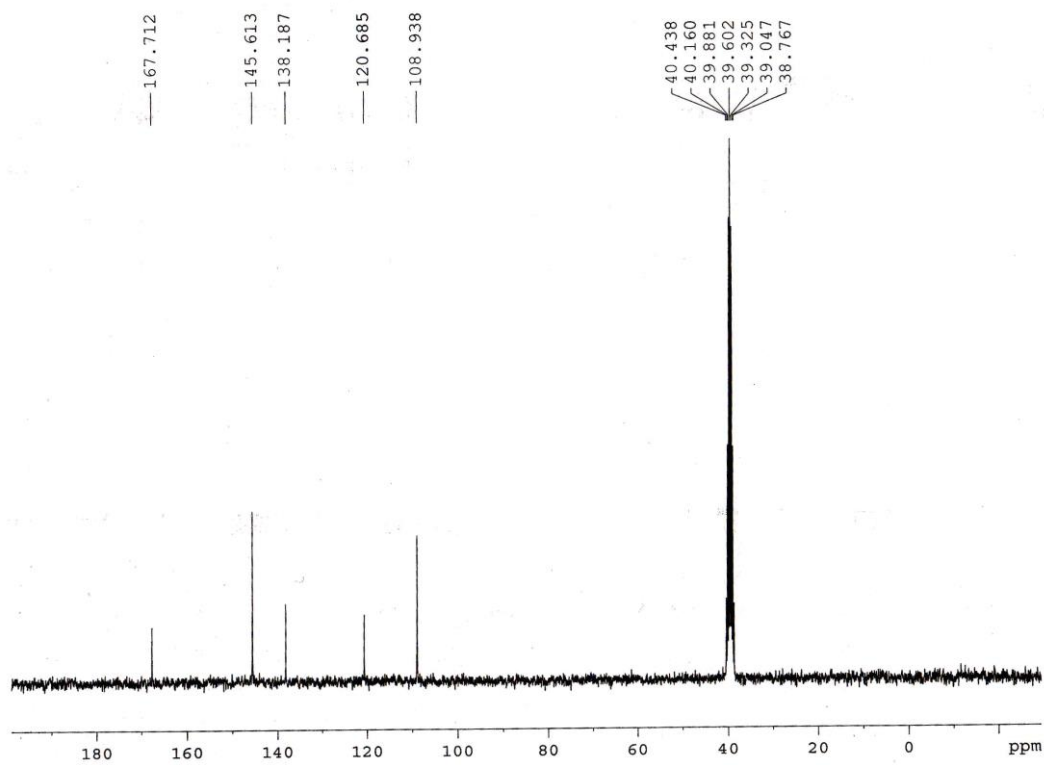

Figure S49. <sup>13</sup>C-NMR of Compound 22 (100MHz, DMSO-d<sub>6</sub>)

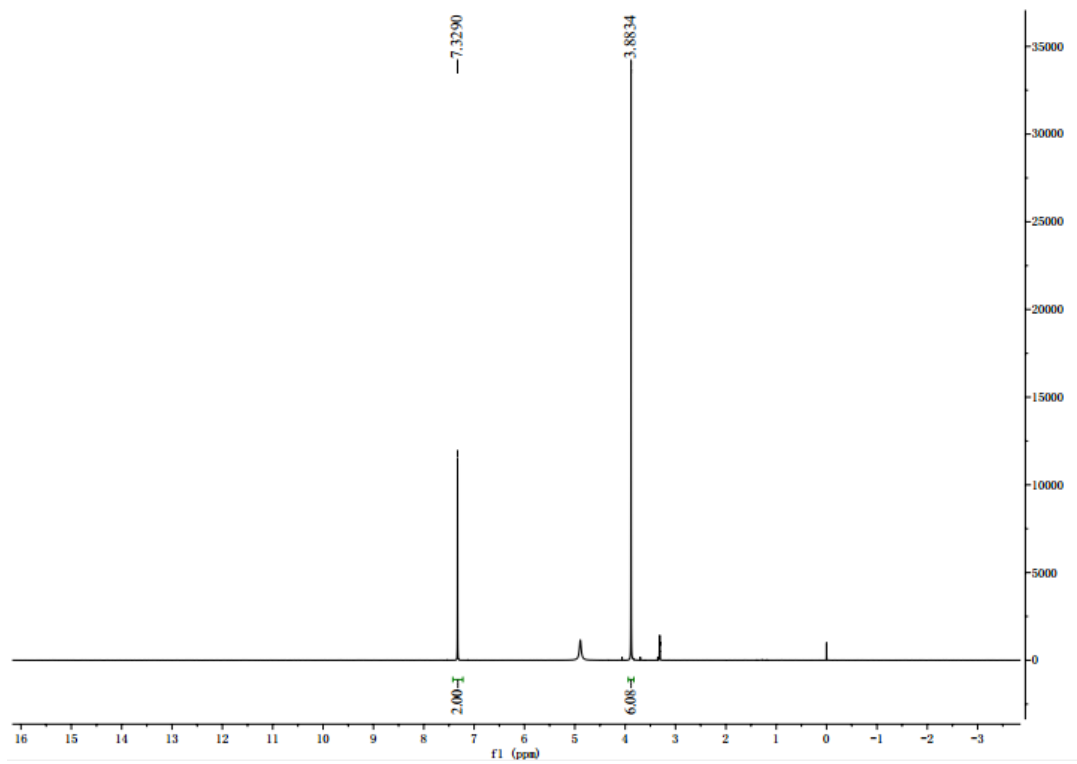

Figure S50. <sup>1</sup>H-NMR of Compound 23 (400MHz, CD<sub>3</sub>OD)

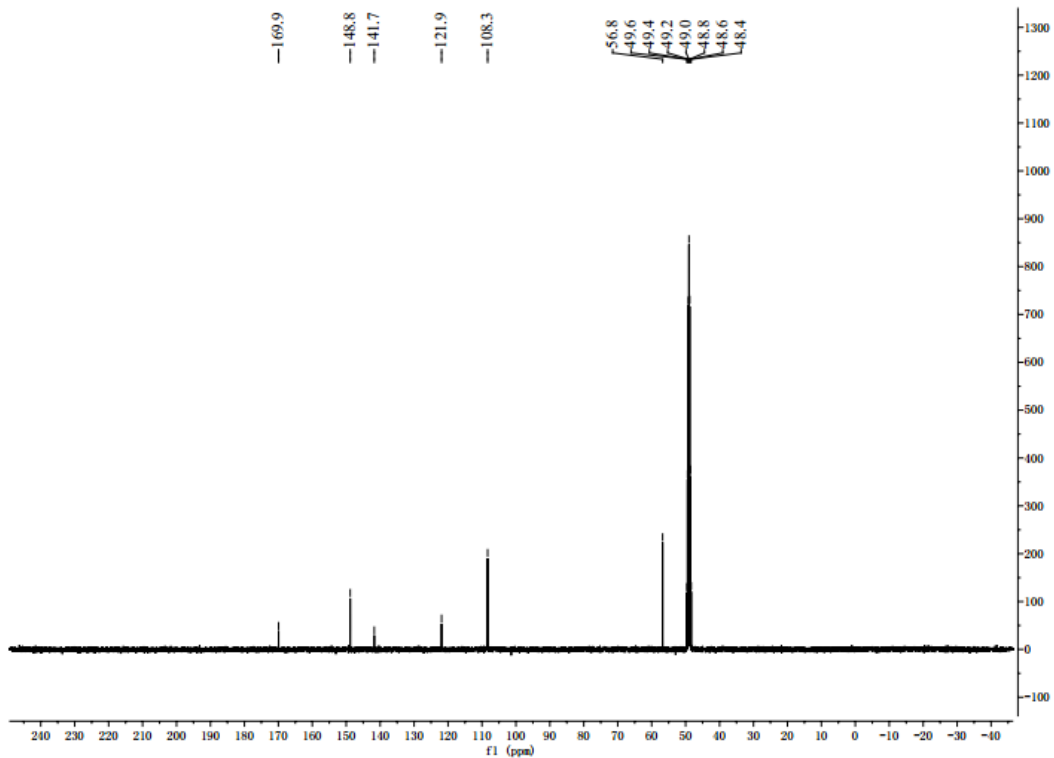

Figure S51. <sup>13</sup>C-NMR of Compound 23 (100MHz, CD<sub>3</sub>OD)

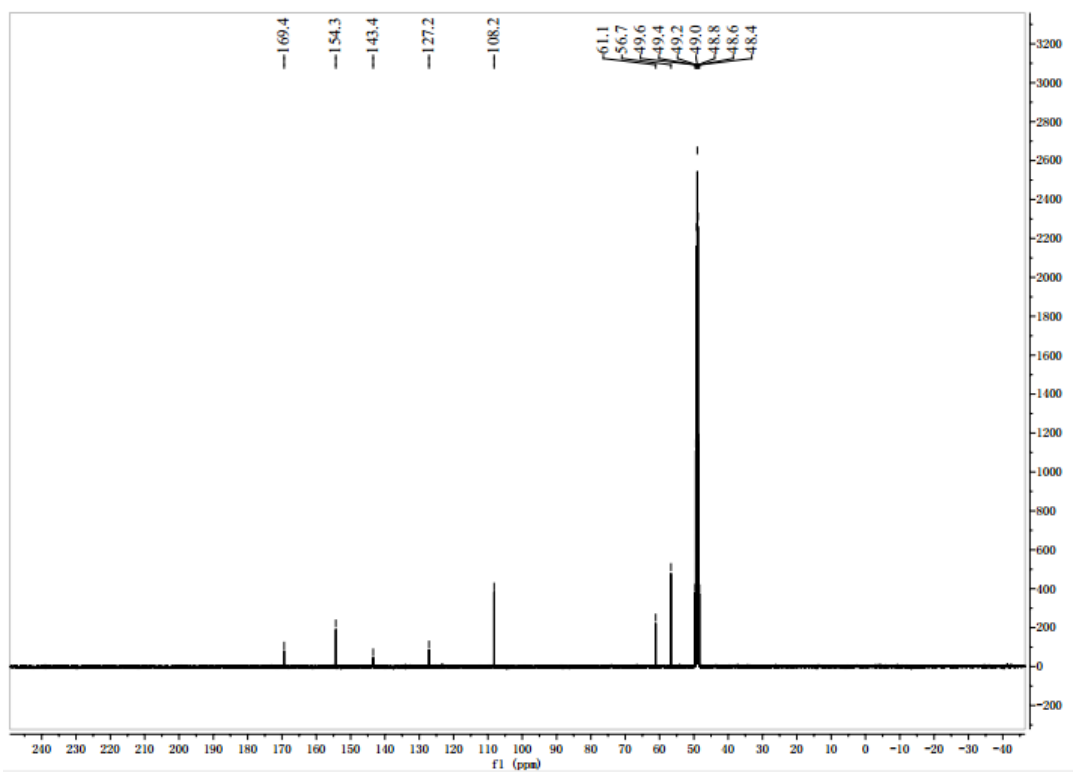

Figure S52. <sup>13</sup>C-NMR of Compound 24 (100MHz, CD<sub>3</sub>OD)

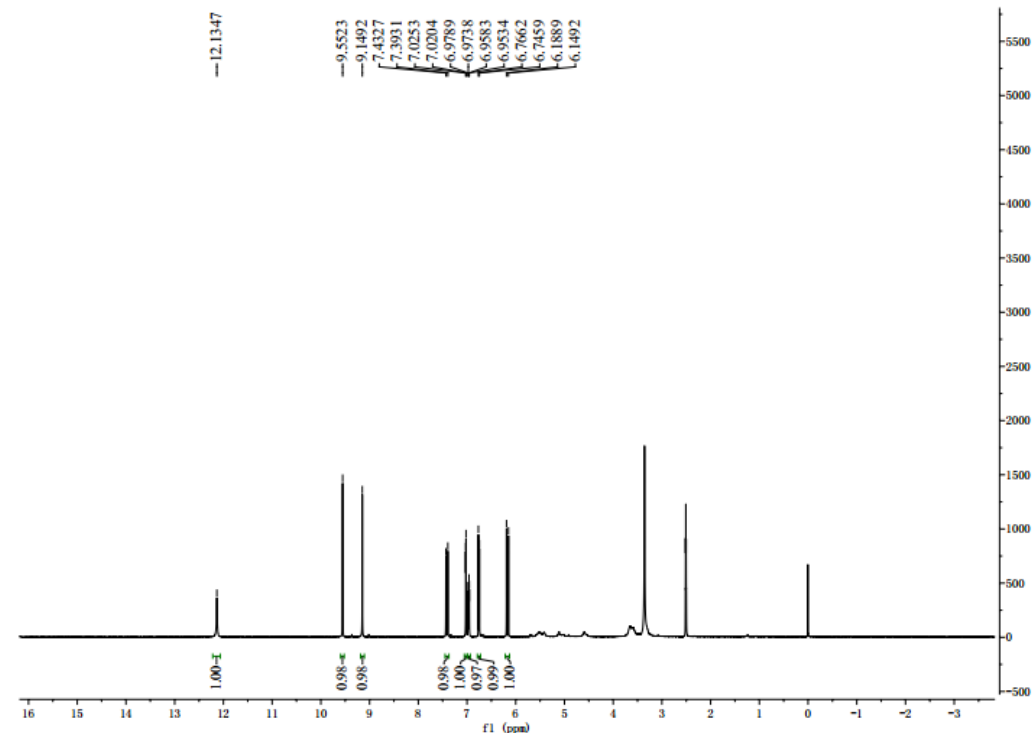

Figure S53.  $^1\text{H-NMR}$  of Compound 25 (400MHz,  $\text{DMSO-d}_6$ )

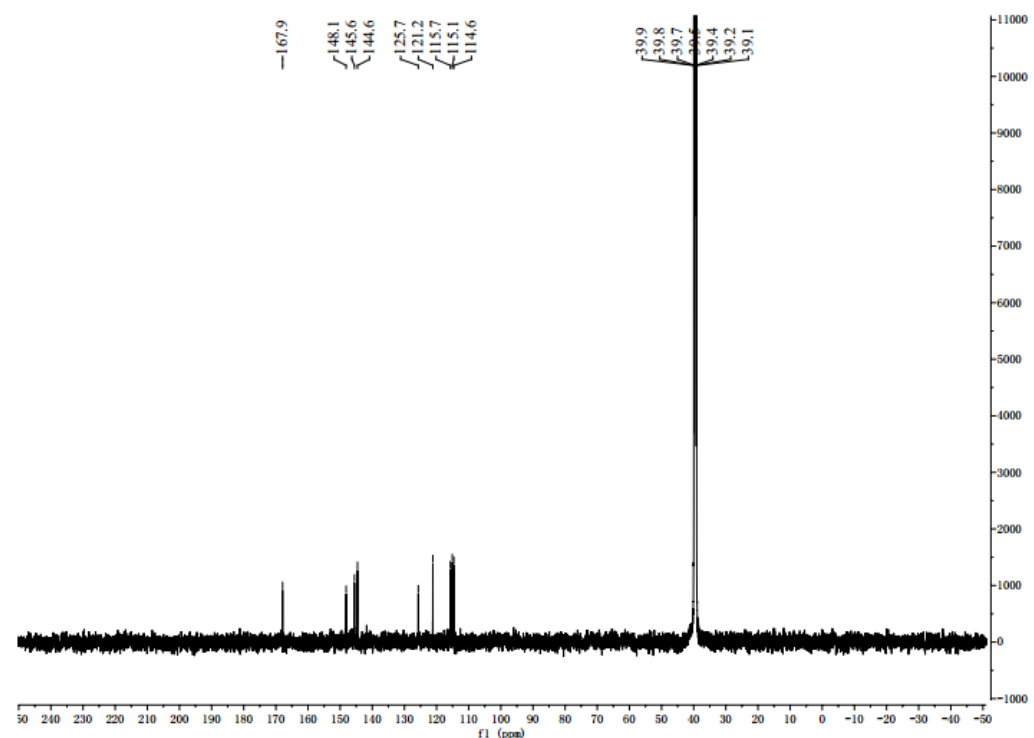

Figure S54.  $^{13}\text{C-NMR}$  of Compound 25 (100MHz,  $\text{DMSO-d}_6$ )

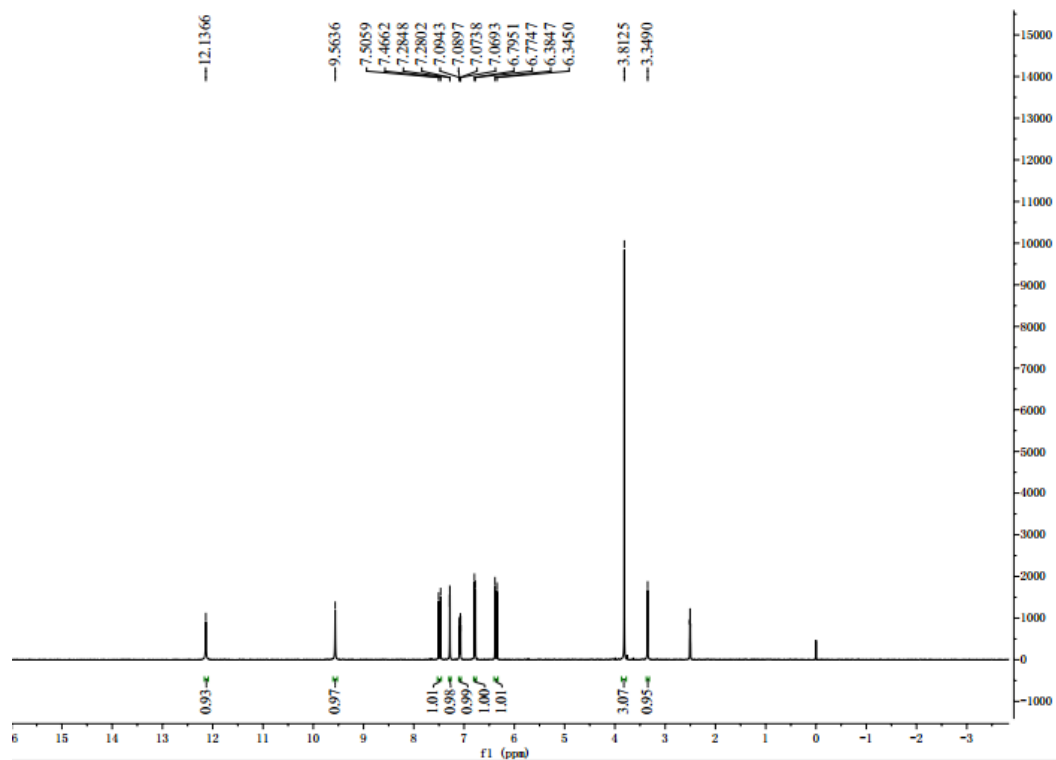

Figure S55.  $^1\text{H-NMR}$  of Compound 26 (400MHz,  $\text{DMSO-d}_6$ )

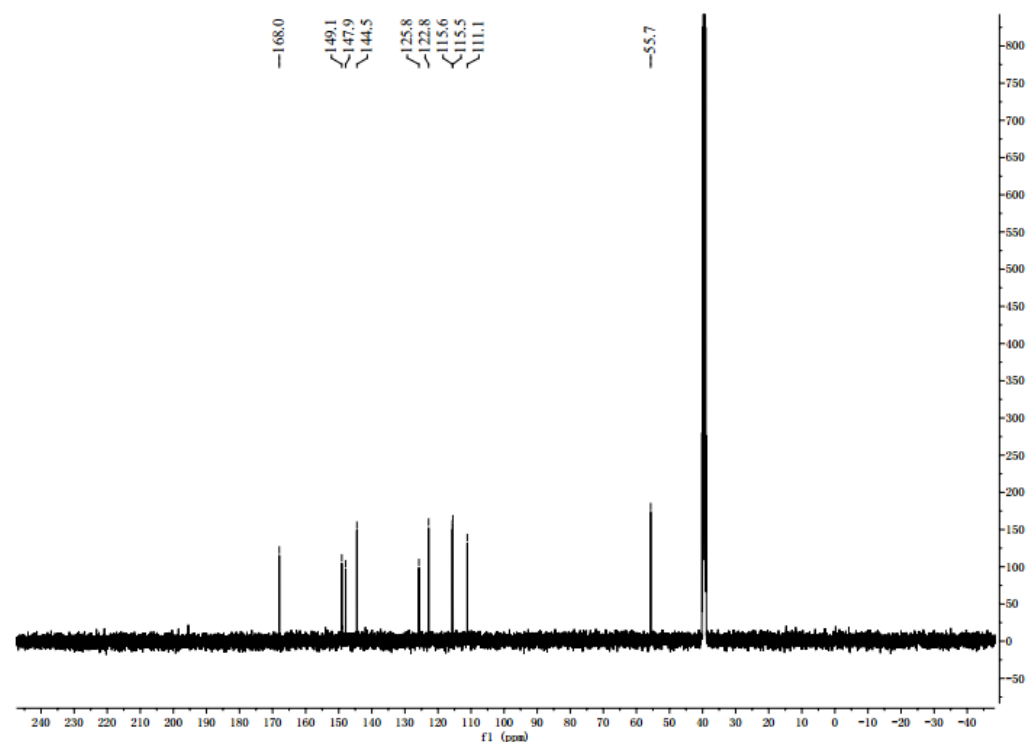

Figure S56.  $^{13}\text{C-NMR}$  of Compound 26 (100MHz,  $\text{DMSO-d}_6$ )
